# Supplementary material for: Comparisons of body mass index, waist circumference, waist-to-height ratio and a body shape index (ABSI) in predicting high blood pressure among Malaysian adolescents: a cross-sectional study
Source: PubMed Central journal article supplement — BMJ Open. 2020 Jan 12;10(1):e032874. doi: 10.1136/bmjopen-2019-032874 (PMC7044891; doi:10.1136/bmjopen-2019-032874), 2020-01-12
Supplement: bmjopen-2019-032874.draft_revisions.pdf [file bmjopen-2019-032874.draft_revisions.pdf]

# BMJ Open

BMJ Open is committed to open peer review. As part of this commitment we make the peer review history of every article we publish publicly available.

When an article is published we post the peer reviewers' comments and the authors' responses online. We also post the versions of the paper that were used during peer review. These are the versions that the peer review comments apply to.

The versions of the paper that follow are the versions that were submitted during the peer review process. They are not the versions of record or the final published versions. They should not be cited or distributed as the published version of this manuscript.

BMJ Open is an open access journal and the full, final, typeset and author-corrected version of record of the manuscript is available on our site with no access controls, subscription charges or pay-per-view fees (<http://bmjopen.bmj.com>).

If you have any questions on BMJ Open's open peer review process please email [info.bmjopen@bmj.com](mailto:info.bmjopen@bmj.com)

# BMJ Open

## Comparisons of body mass index, waist circumference, waist-to-height ratio and a body shape index in predicting high blood pressure among Malaysian adolescents: a cross-sectional study

|                               |                                                                                                                                                                                                                                                                                                                                |
|-------------------------------|--------------------------------------------------------------------------------------------------------------------------------------------------------------------------------------------------------------------------------------------------------------------------------------------------------------------------------|
| Journal:                      | <i>BMJ Open</i>                                                                                                                                                                                                                                                                                                                |
| Manuscript ID                 | bmjopen-2019-032874                                                                                                                                                                                                                                                                                                            |
| Article Type:                 | Research                                                                                                                                                                                                                                                                                                                       |
| Date Submitted by the Author: | 10-Jul-2019                                                                                                                                                                                                                                                                                                                    |
| Complete List of Authors:     | Tee, Joyce; Universiti Putra Malaysia, Department of Nutrition and Dietetics, Faculty of Medicine and Health Sciences<br>Gan, Wan Ying ; Universiti Putra Malaysia, Department of Nutrition and Dietetics, Faculty of Medicine and Health Sciences<br>Lim, Poh Ying; Universiti Putra Malaysia, Department of Community Health |
| Keywords:                     | Hypertension < CARDIOLOGY, body mass index, waist circumference, waist-to-height ratio, a body shape index, Malaysian adolescents                                                                                                                                                                                              |
|                               |                                                                                                                                                                                                                                                                                                                                |

SCHOLARONE™  
Manuscripts

1  
2  
3 **Comparisons of body mass index, waist circumference, waist-to-height ratio and a body**  
4 **shape index in predicting high blood pressure among Malaysian adolescents: a cross-**  
5 **sectional study**  
6  
7  
8  
9

10  
11  
12 Joyce Ying Hui Tee<sup>1</sup>, Wan Ying Gan<sup>1</sup>, Poh Ying Lim<sup>2</sup>  
13  
14

- 15  
16  
17 1. Department of Nutrition and Dietetics, Faculty of Medicine and Health Sciences, Universiti  
18 Putra Malaysia, Malaysia  
19  
20 2. Department of Community Health, Faculty of Medicine and Health Sciences, Universiti  
21 Putra Malaysia, Malaysia  
22  
23  
24  
25  
26  
27

28 Correspondence to

29  
30 Wan Ying Gan; wanying@upm.edu.my  
31  
32  
33  
34  
35  
36  
37  
38  
39  
40  
41  
42  
43  
44  
45  
46  
47  
48  
49  
50  
51  
52  
53  
54  
55  
56  
57  
58  
59  
60

## Abstract

**Objective:** To compare the performance of different anthropometric indices including body mass index (BMI), waist circumference (WC), waist-to-height ratio (WHtR) and a body shape index (ABSI) to predict high blood pressure (BP) in adolescents using the 90th and 95th percentiles as two different thresholds.

**Design:** Cross-sectional study.

**Setting:** Probability proportionate to size was used to randomly select two schools in Selangor state, Malaysia.

**Participants:** A total of 513 adolescents (58.9% women and 41.1% men) aged 12 to 16 years were recruited.

**Primary and secondary outcome measures:** Weight, height, WC and BP of the adolescents were measured. The predictive power of anthropometric indices was analyzed by sex using the receiver operating characteristic (ROC) curve.

**Results:** BMI and WHtR were the indices with higher areas under the curve (AUCs), yet the optimal cut-offs to predict high BP using the 95th percentile were higher than the threshold for overweight/obesity. Most indices showed poor sensitivity under the suggested cut-offs. In contrast, the optimal BMI and WHtR cut-offs to predict high BP using the 90th percentile were lower (men: BMI-for-age = 0.79, WHtR = 0.46; women: BMI-for-age = 0.92, WHtR = 0.45). BMI showed the highest AUC in both sexes but had poor sensitivity among women. WHtR presented good sensitivity and specificity in both sexes.

**Conclusions:** These findings suggested that WHtR is an accurate and practical screening tool to predict high BP among Malaysian adolescents alongside BMI.

### Strengths and limitations of this study

- Sex-specific analysis of ROC was conducted as body composition differed significantly between men and women.
- Two separate analyses using the 90th and 95th percentile cut-offs for differentiating high BP were performed, which allowed a better comparison of the predictive power of anthropometric indices to detect high BP in adolescents.
- Causal association between anthropometric indices and high BP cannot be determined because of the cross-sectional study design.
- Confounding effects of the potential covariates such as age, physical activity level, family hypertension history and obesity were not determined in this study.

### Introduction

Hypertension has been recognized as the leading risk factor for global disease burden. It is the most common medical condition that is linked to cardiovascular diseases (CVDs), which is the main source of mortality around the world.<sup>1</sup> In 2015, the global prevalence of raised blood pressure (BP) was 24.1% in men and 20.1% in women.<sup>2</sup> In Malaysia, one in three Malaysian adults is hypertensive.<sup>3</sup> Strong evidence suggested that raised blood pressure tracks well from childhood to adulthood, yet pediatric hypertension remains largely underdiagnosed. Moreover, no data regarding the national prevalence of hypertension among Malaysian adolescents have been reported. This could probably be due to a more complicated classification of BP that varies with age, sex and height, while routine BP screening was not emphasized in pediatric clinics.

Many studies discovered the rising trend of hypertension in children and adolescents was attributed to the obesity epidemic.<sup>4,5</sup> Obese adolescents were found to have a fourfold to tenfold higher risk of developing hypertension.<sup>6</sup> Even in normal-weight adolescents, the odds



1  
2  
3 analyze the discrimination abilities of anthropometric indices, the use of receiver operating  
4 characteristic (ROC) analysis has been recommended.<sup>20</sup> Cut-off values of anthropometric  
5 indices for predicting high BP could be established by running ROC analysis, which is  
6 invariably useful in screening. Up to date, very few studies performed ROC analysis and  
7 compared several anthropometric indices in Asian adolescent populations.<sup>15</sup> Therefore, the  
8 present study aimed to compare the predictive power of different anthropometric indices for  
9 high BP while also to determine the optimal cut-off values for differentiating high BP among  
10 Malaysian adolescents.  
11  
12  
13  
14  
15  
16  
17  
18  
19  
20  
21  
22  
23

## 24 **Materials and methods**

### 25 **Study design and population**

26 This was a cross-sectional study involving Malaysian adolescents aged between 12 and 16  
27 years. The probability proportionate to size was used as the sampling method, in which two  
28 government secondary schools in Selangor state were randomly selected. Adolescents who had  
29 medical conditions (e.g. sleep disorders, diabetes, thyroid disease and CVDs), neurological or  
30 psychiatric disorders (e.g. autism spectrum disorders, anxiety and depression), learning  
31 disabilities or developmental delays were excluded from the study. Five hundred sixty eligible  
32 adolescents were recruited and 513 of them agreed to participate in this study.  
33  
34  
35  
36  
37  
38  
39  
40  
41  
42  
43  
44

45 Before the commencement of the study, ethics approval was obtained from the Ethics  
46 Committee for Research Involving Human Subject of Universiti Putra Malaysia [Reference No.  
47 FPSK(EXP16) P186]. Approval to conduct the study was obtained from the Ministry of  
48 Education, Selangor Department of Education, as well as from the principals of the selected  
49 schools. Prior to data collection, all eligible adolescents were explained about the study's  
50 objectives and the activities they would be involved in, with an information sheet provided. A  
51 set of parent's and adolescent's consent forms were taken home by the adolescents. All the  
52  
53  
54  
55  
56  
57  
58  
59  
60

1  
2  
3 completed forms were collected back on the next day. Adolescents who returned the parent's  
4 and adolescent's consent form were recruited into this study. Each of them underwent both  
5 anthropometric and BP measurements.  
6  
7  
8  
9

### 10 11 12 **Anthropometric measurements** 13

14 All measurements were taken twice to obtain the average value for further data analysis.  
15  
16 Adolescents' body weight and height were taken in light clothing and without shoes by using  
17 a TANITA weighing scale THD-306 (TANITA Corporation, Arlington Heights, IL, USA) and  
18 a SECA portable stadiometer 213 (SECA, Hamburg, Germany), respectively. The World  
19 Health Organization (WHO) AnthroPlus software version 1.0.4 (WHO, Geneva, Switzerland)  
20 was used to calculate the BMI-for-age z-score (BAZ) of the adolescents. They were further  
21 classified into several categories of body weight status according to the WHO Growth  
22 Reference 2007.<sup>21</sup> In terms of WC, adolescents were requested to fold their arms in front of  
23 their chest in a relaxed standing position while the measurements were taken using a Lufkin  
24 executive diameter pocket tape (Apex Tool Group, Apex, NC, USA). According to the WC  
25 percentile chart for Malaysian childhood population, a WC of >90th percentile was used as the  
26 cut-off point to define abdominal obesity.<sup>22</sup> Besides, WHtR was computed by dividing WC  
27 (cm) by height (cm). Abdominal obesity was classified as WHtR  $\geq 0.5$ .<sup>23</sup> ABSI of adolescents  
28 was calculated using the formula proposed by Xu, Yan and Cheung<sup>19</sup> as shown below, with  
29 WC and height measured in meter. Higher ABSI indicated a greater fraction of visceral fat to  
30 body size.  
31  
32  
33  
34  
35  
36  
37  
38  
39  
40  
41  
42  
43  
44  
45  
46  
47  
48  
49  
50

$$51 \quad ABSI = \frac{WC}{52 \quad BMI^{0.45} \times Height^{0.55}} \\ 53 \quad 54 \quad 55 \quad 56 \quad 57 \quad 58 \quad 59 \quad 60$$



### Blood pressure measurement

Blood pressure was measured using a digital sphygmomanometer (Omron Model IA2 blood pressure monitor, Omron, Kyoto, Japan). Adolescents were asked to sit relaxed on a chair with their arms supported comfortably at the vertical level. They were classified as normal BP (<90th percentile), pre-hypertension ( $\geq 90$ th to <95th percentile), stage 1 (95th to 99th percentile) and stage 2 hypertension ( $> 99$ th percentile) using the normative tables of BP based on age and sex adjusted for height percentiles.<sup>24</sup> For ROC analysis, adolescents were separated into two BP categories: group A included those with normal BP (<95th percentile: normal and pre-hypertension) and high BP ( $\geq 95$ th percentile: hypertension stages 1 and 2) and group B included those with normal BP (<90th percentile: normal) and high BP ( $\geq 90$ th percentile: pre-hypertension and hypertension stages 1 and 2).

### Statistical analysis

All data were analyzed using the IBM SPSS Statistics 24 (IBM Corp., Armonk, NY, USA). The descriptive data on body composition and BP of adolescents were summarized in the total sample and by sexes. ROC analysis was employed to compare the predictive power of different body composition indices in differentiating the classification of pre-hypertension and hypertension among the adolescents. The area under the curve (AUC) was used to summarize the predictive power of these measures for high BP. An AUC of 1 reflected a perfectly accurate test, whereas 0.5 suggested that the test has no discriminatory ability. An AUC <0.7 was considered as poor, 0.7–0.8 as acceptable, 0.8–0.9 as good and >0.9 as excellent.<sup>25</sup> The optimal cut-off values of the anthropometric indices to predict high BP were estimated based on the largest value of the Youden index ( $J = Se + Sp - 1$ ).<sup>26</sup> Sensitivity, specificity and the Youden index were used to evaluate the validity of different indices in predicting high BP. The

acceptable level of sensitivity and specificity of screening tests adopted in this study was 70.0%.<sup>27</sup> The level of significance for all tests was set at  $p < 0.05$ .

### Patient and public involvement

Study participants were generally healthy adolescents and no patients were involved in the study. Adolescents and their parents were not involved in the design and conduct of the study. The individual results such as weight, height, waist circumference, and blood pressure were recorded into individual health information, and this information was given back to the adolescents on the same day of data collection.

### Results

The anthropometric characteristics and BP of the adolescents in the full sample and by sex are shown in Table 1. Based on the classifications of BMI-for-age, one in three of the adolescents was overweight or obese (32.6%). The prevalence of abdominal obesity based on WC and WHtR classifications were 14.0% and 18.5%, respectively. Almost one-fifth of the adolescents were classified as pre-hypertension (19.1%), whereas 11.9% of them were at hypertension stage 1 or 2.

**Table 1** Mean, standard deviation, range and classifications of BMI-for-age, WC, WHtR, ABSI and blood pressure of adolescents (n=513)

| Variables                  | n (%)           |                |                 |
|----------------------------|-----------------|----------------|-----------------|
|                            | Total (n=513)   | Males (n=211)  | Females (n=302) |
| <b>BMI-for-age z-score</b> | 0.25 ± 1.52     | 0.41 ± 1.60    | 0.13 ± 1.45     |
| Mean ± SD (Range)          | (-3.95 – 4.6)   | (-3.95 – 4.16) | (-3.64 – 3.95)  |
| Thinness                   | 35 (6.8)        | 16 (7.6)       | 19 (6.3)        |
| Normal                     | 311 (60.6)      | 114 (54.0)     | 197 (65.2)      |
| Overweight                 | 93 (18.1)       | 40 (19.0)      | 53 (17.5)       |
| Obesity                    | 74 (14.5)       | 41 (19.4)      | 33 (11.0)       |
| <b>WC (cm)</b>             | 69.83 ± 10.57   | 71.35 ± 11.08  | 68.77 ± 10.08   |
| Mean ± SD (Range)          | (52.50 – 111.0) | (52.6 – 111.0) | (52.0 – 108.0)  |
| Normal                     | 441 (86.0)      | 179 (84.8)     | 262 (86.8)      |

|                               |                 |                 |                 |
|-------------------------------|-----------------|-----------------|-----------------|
| Abdominal obesity             | 72 (14.0)       | 32 (15.2)       | 40 (13.2)       |
| <b>WHtR</b>                   | 0.45 ± 0.06     | 0.45 ± 0.07     | 0.44 ± 0.06     |
| Mean ± SD (Range)             | (0.32 – 0.71)   | (0.32 – 0.68)   | (0.32 – 0.71)   |
| Normal                        | 418 (81.5)      | 163 (77.3)      | 418 (81.5)      |
| Abdominal obesity             | 95 (18.5)       | 48 (22.7)       | 95 (18.5)       |
| <b>ABSI</b>                   | 0.1389 ± 0.0074 | 0.1402 ± 0.0005 | 0.1379 ± 0.0004 |
| Mean ± SD (Range)             | (0.12 – 0.17)   | (0.13 – 0.17)   | (0.12 – 0.16)   |
| <b>Systolic BP</b>            | 113.4 ± 14.4    | 116.2 ± 14.7    | 111.4 ± 13.9    |
| Mean ± SD (Range)             | (79.0 – 159.0)  | (82.0 – 159.0)  | (79.0 – 155.5)  |
| <b>Diastolic BP</b>           | 67.1 ± 9.8      | 65.5 ± 9.6      | 68.2 ± 9.9      |
| Mean ± SD (Range)             | (63.8 – 35.0)   | (42.0 – 92.6)   | (35.0 – 98.8)   |
| <b>BP classification</b>      |                 |                 |                 |
| Normal                        | 354 (69.0)      | 147 (69.7)      | 207 (68.5)      |
| (< 90th percentile)           |                 |                 |                 |
| Prehypertension               | 98 (19.1)       | 38 (18.0)       | 60 (19.9)       |
| (≥ 90th to < 95th percentile) |                 |                 |                 |
| Hypertension stage 1          | 43 (8.4)        | 21 (10.0)       | 22 (7.3)        |
| (95th to 99th percentile)     |                 |                 |                 |
| Hypertension stage 2          | 18 (3.5)        | 5 (2.4)         | 13 (4.3)        |
| (> 99th percentile)           |                 |                 |                 |

BMI: body mass index; WC: waist circumference; WHtR: Waist-to-height ratio; ABSI: a body shape index; BP: blood pressure; SD: standard deviation.

### ROC analysis based on group A

Table 2 summarizes the results of the ROC analysis of various anthropometric indices with high BP (≥95th percentile) among adolescents. These findings were based on group A whereby pre-hypertensive adolescents were grouped in the normal BP group (normal and pre-hypertensive) versus the high BP group (hypertension stages 1 and 2). Overall, the AUCs of BMI-for-age, WC and WHtR (range from 0.81 to 0.86) indicated good predictive power in assessing high BP of adolescents, whereas the AUC of ABSI in the total sample was less than 0.8, showing an acceptable level of predictive power. In men, the AUC of BMI was the highest (0.817), followed by WHtR (0.789), WC (0.781) and ABSI (0.709). As for the women, WC (0.863) showed the highest AUC, whereas BMI and WHtR had the same AUC (0.854) with the lowest for ABSI (0.756). Based on the Youden index, the optimal cut-off values of BMI-for-age for predicting high BP were 1.87 in men and 1.18 in women, whereas for WC were the 78th percentile for men and the 73rd percentile for women. Optimal WHtR cut-off values were

0.52 for men and 0.45 for women, whereas ABSI cut-off values to identify hypertensive adolescents were 0.15 for men and 0.14 for women. In the full sample and the women group, WHtR has the highest sensitivity (>90.0%) in identifying hypertensive adolescents, whereas BMI-for-age showed the highest specificity (>80.0%) in identifying those with normal BP. Most indices did not show an acceptable level of sensitivity (<70.0%) for the prediction of high BP in men, while the index with the highest specificity was WC.

**Table 2** Area under ROC curve (AUC), optimal cut-off values, sensitivities, specificities and Youden index of anthropometric indices in predicting high blood pressure according to sex in Group A

| Body composition indices | AUC (95% CI)             | <i>p</i> | Cut-off value | Sensitivity (%) | Specificity (%) | Youden index |
|--------------------------|--------------------------|----------|---------------|-----------------|-----------------|--------------|
| <b>Total (n = 513)</b>   |                          |          |               |                 |                 |              |
| BMI-for-age z-score      | 0.835<br>(0.782 – 0.889) | <0.001   | 1.47          | 68.9            | 83.6            | 0.525        |
| WC percentile            | 0.828<br>(0.768 – 0.888) | <0.001   | 73.0          | 80.3            | 72.1            | 0.525        |
| WHtR                     | 0.823<br>(0.759 – 0.887) | <0.001   | 0.44          | 90.2            | 63.7            | 0.539        |
| ABSI                     | 0.735<br>(0.662 – 0.809) | <0.001   | 0.14          | 68.9            | 71.5            | 0.403        |
| <b>Males (n = 211)</b>   |                          |          |               |                 |                 |              |
| BMI-for-age z-score      | 0.817<br>(0.723 – 0.912) | <0.001   | 1.87          | 69.2            | 84.3            | 0.536        |
| WC percentile            | 0.781<br>(0.671 – 0.891) | <0.001   | 78.0          | 57.7            | 90.8            | 0.485        |
| WHtR                     | 0.789<br>(0.675 – 0.903) | <0.001   | 0.52          | 65.4            | 87.6            | 0.530        |
| ABSI                     | 0.709<br>(0.577 – 0.841) | <0.001   | 0.15          | 65.4            | 85.4            | 0.508        |
| <b>Females (n = 302)</b> |                          |          |               |                 |                 |              |

|                        |                             |        |      |      |      |       |
|------------------------|-----------------------------|--------|------|------|------|-------|
| BMI-for-age<br>z-score | 0.854<br>(0.793 –<br>0.916) | <0.001 | 1.18 | 71.4 | 83.5 | 0.549 |
| WC percentile          | 0.863<br>(0.798 –<br>0.927) | <0.001 | 73.0 | 85.7 | 74.2 | 0.599 |
| WHtR                   | 0.854<br>(0.781 –<br>0.927) | <0.001 | 0.45 | 94.3 | 65.9 | 0.602 |
| ABSI                   | 0.756<br>(0.670 –<br>0.843) | <0.001 | 0.14 | 82.9 | 62.9 | 0.458 |

BMI: body mass index; WC: waist circumference; WHtR: Waist-to-height ratio; ABSI: a body shape index; ROC: receiver operating characteristic; AUC: area under the curve; CI: confidence interval.

### ROC analysis based on group B

Table 3 shows the results of the ROC analysis of various anthropometric indices with high BP ( $\geq 90$ th percentile) based on group B, whereby pre-hypertensive and hypertensive adolescents were grouped together in the high BP group. The AUCs of BMI (0.793), WC (0.781) and WHtR (0.781) showed acceptable to good predictive power for high BP, except for ABSI ( $< 0.70$ ). The AUC of BMI-for-age was the highest in both sexes, followed by WHtR, WC and ABSI in women and WC, WHtR and ABSI in men. For the prediction of high BP, the optimal cut-off values of BMI-for-age were 0.79 and 0.92 in men and women, respectively. The optimal WC cut-off points used to discriminate high BP were the 70th percentile for men and the 72nd percentile for women, whereas WHtR cut-off points were 0.46 in men and 0.45 in women. ABSI cut-off values to identify hypertensive adolescents were 0.14 in both sexes. WHtR consistently showed good sensitivity and specificity ( $> 70.0\%$ ) in predicting high BP from both sexes and the full sample. The highest percentage of hypertensive adolescents could be identified based on WHtR in women (sensitivity: 71.6%) and BMI-for-age in men (sensitivity: 79.7%). On the other hand, BMI-for-age showed the highest specificity (84.5%) in women, whereas WHtR had the highest specificity in men (80.3%).

**Table 3** Area under ROC curve (AUC), optimal cut-off values, sensitivities, specificities and Youden index of anthropometric indices in predicting high blood pressure according to sex in Group B

| Body composition indices | AUC (95% CI)             | <i>p</i> | Cut-off value | Sensitivity (%) | Specificity (%) | Youden index |
|--------------------------|--------------------------|----------|---------------|-----------------|-----------------|--------------|
| <b>Total (n = 513)</b>   |                          |          |               |                 |                 |              |
| BMI-for-age z-score      | 0.793<br>(0.750 – 0.836) | <0.001   | 0.79          | 71.1            | 76.6            | 0.476        |
| WC percentile            | 0.781<br>(0.737 – 0.825) | <0.001   | 73.0          | 66.0            | 80.2            | 0.463        |
| WHtR                     | 0.781<br>(0.736 – 0.826) | <0.001   | 0.44          | 74.2            | 71.5            | 0.457        |
| ABSI                     | 0.688<br>(0.637 – 0.739) | <0.001   | 0.14          | 57.2            | 74.3            | 0.315        |
| <b>Males (n = 211)</b>   |                          |          |               |                 |                 |              |
| BMI-for-age z-score      | 0.808<br>(0.744 – 0.872) | <0.001   | 0.79          | 79.7            | 70.7            | 0.504        |
| WC percentile            | 0.788<br>(0.720 – 0.857) | <0.001   | 72.0          | 70.5            | 78.9            | 0.492        |
| WHtR                     | 0.799<br>(0.732 – 0.865) | <0.001   | 0.46          | 70.3            | 80.3            | 0.506        |
| ABSI                     | 0.730<br>(0.650 – 0.809) | <0.001   | 0.14          | 70.3            | 72.1            | 0.424        |
| <b>Females (n = 302)</b> |                          |          |               |                 |                 |              |
| BMI-for-age z-score      | 0.786<br>(0.729 – 0.843) | <0.001   | 0.92          | 63.2            | 84.5            | 0.477        |
| WC percentile            | 0.777<br>(0.719 – 0.835) | <0.001   | 70.0          | 63.1            | 81.2            | 0.443        |
| WHtR                     | 0.768<br>(0.708 – 0.828) | <0.001   | 0.45          | 71.6            | 72.9            | 0.445        |
| ABSI                     | 0.665<br>(0.598 – 0.731) | <0.001   | 0.14          | 54.9            | 70.0            | 0.248        |

BMI: body mass index; WC: waist circumference; WHtR: Waist-to-height ratio; ABSI: a body shape index; ROC: receiver operating characteristic; AUC: area under the curve; CI: confidence interval.

## Discussion

This study analyzed the existing anthropometric indices for their predictive power of high BP in adolescents based on two different grouping methods. Comparable results were obtained from the ROC analysis using the  $\geq 95$ th percentile cut-off points (group A) versus the  $\geq 90$ th percentile (group B) to define high BP. Increasing evidence demonstrated the predictive power of different anthropometric indices for raised BP as defined by the  $\geq 95$ th percentile systolic or diastolic BP in children and adolescents.<sup>28–30</sup> Yet, none of the studies established the optimal cut-off values of anthropometric measures in identifying those with high BP, except for Liang *et al.*<sup>28</sup> who reported WC cut-off values.

Using the  $\geq 95$ th percentile threshold to define high BP, we found that anthropometric indices had relatively lower sensitivities ( $< 70.0\%$ ) in predicting, especially among the men. In both sexes, the optimal cut-off values of BMI-for-age to predict high BP were higher than the reference criteria used to identify overweight ( $BAZ \geq 1$ ).<sup>21</sup> Likewise, the optimal cut-off value of WHtR in male adolescents was above the common cut-off that defines abdominal obesity ( $WHtR \geq 0.5$ ). These results were due to the high proportion of pre-hypertensive adolescents with excess adiposity. In the pre-hypertension group, more than half of them were overweight or obese (based on the BMI-for-age), whereas more than one-third of the male adolescents (36.8%) were abdominally obese (based on the WHtR). Concurrently, a previous study showed that pre-hypertensive adolescents were more likely to be overweight and obese, with more than fourfold greater incidence rate of hypertension (up to 7% per year) as compared with those with normal BP.<sup>31</sup> In addition, emerging data from cohort studies showed that pre-hypertension increased the risk of CVD over time, even after adjusting for multiple cardiovascular risk factors.<sup>32,33</sup> Given the strong tracking of BP from childhood to adulthood, careful attention should be given to pre-hypertensive condition especially during adolescence. Hence, it is also

1  
2  
3 suggested that more accurate prediction of high BP from anthropometric indices should be  
4  
5 based on the 90th percentile threshold.  
6  
7

8 On the other hand, current results based on group B confirmed the significant ability of  
9  
10 BMI, WC, WHtR and ABSI to discriminate both hypertensive and pre-hypertensive  
11  
12 adolescents. These findings replicated previous studies on the use of the 90th percentile for  
13  
14 raised BP in adolescents of different ethnic groups.<sup>6,34</sup> The AUC of BMI-for-age was the  
15  
16 highest, whereas the AUCs of WC and WHtR were comparable and performed similarly well  
17  
18 to predict high BP in adolescents. However, BMI-for-age and WC showed low sensitivities in  
19  
20 identifying women with high BP. Considering both sensitivity and specificity, WHtR appeared  
21  
22 to be the best in discriminating high BP among men and women. Altogether, these results  
23  
24 suggest that WHtR is the most accurate indicator to predict the presence of elevated BP  
25  
26 alongside BMI.  
27  
28  
29

30 Studies found that BMI and WC were good predictors of elevated BP in adolescents.<sup>9,34</sup>  
31  
32 However, both indices exhibited low sensitivity in discriminating individuals with high BP.<sup>35,36</sup>  
33  
34 This could be due to the inability of BMI to measure fat distribution and differentiate adipose  
35  
36 tissues and muscle mass. Previous findings also discovered the relatively weak association of  
37  
38 BMI and percent body fat in Asians as compared with other ethnic groups, and a large  
39  
40 proportion of individuals with high body fat content remained undetectable based on their  
41  
42 BMI.<sup>37,38</sup> Thus, screening by BMI alone could potentially lead to underestimation of obesity-  
43  
44 related diseases including hypertension. Given the close link of excess visceral fat and  
45  
46 metabolic complications, indicators that reflect abdominal obesity such as WC and WHtR may  
47  
48 perform better in predicting cardiometabolic risks.<sup>28</sup> Nonetheless, WC is a height-dependent  
49  
50 variable; thus, not all individuals with the same WC had a similar risk of disease. Consistent  
51  
52 findings revealed a higher metabolic risk in shorter individuals than taller ones at a given  
53  
54 WC.<sup>39,40</sup> Even with the use of sex-specific WC percentile adjusted for age, WC might  
55  
56  
57  
58  
59  
60



1  
2  
3 overestimate the risk of hypertension in tall adolescents but underestimate risk in short  
4 adolescents since height is a risk factor of hypertension.<sup>41</sup>  
5  
6

7  
8 Findings from various Asian countries concurrently supported the superiority of WHtR  
9  
10 over WC and BMI in predicting hypertension among adolescents.<sup>41</sup> Similar results were  
11 demonstrated in a meta-analysis review focusing on the Asian population. Nevertheless, some  
12 studies showed the poor prediction of WHtR for hypertension in children and adolescents  
13 mainly in European countries.<sup>42,43</sup> The discrepancy of results could be due to ethnicity  
14 differences. As compared with Caucasians, the Asian population tends to have a greater amount  
15 of abdominal fat and total body fat but shorter height, which were associated with higher risk  
16 of hypertension through several mechanisms such as systemic inflammation, leptin resistance,  
17 hydrostatic blood vessel pressure and fat distribution around the kidneys.<sup>44</sup> Variations in term  
18 of genetic-environmental interaction, socioeconomic status, cultural influences and lifestyle-  
19 related risk factors such as salt intake and physical activity level across ethnicity groups could  
20 affect the findings.<sup>45,46</sup> Besides, the variation of WHtR across age might reduce its efficacy to  
21 detect abdominal fat in children undergoing pubertal growth, since the rapid increase in height  
22 was relatively greater than the increase in WC.<sup>47</sup>  
23  
24  
25  
26  
27  
28  
29  
30  
31  
32  
33  
34  
35  
36  
37  
38  
39

40 The current study found that the optimal cut-off points of BMI, WC and WHtR for the  
41 prediction of high BP were lower than the threshold to define obesity in adolescents, replicating  
42 the results of previous studies.<sup>36,48</sup> In the present study, the optimal WHtR cut-off values were  
43 0.46 in men and 0.45 in women, which were close to the WHtR cut-off values (<0.5) reported  
44 by previous studies for the prediction of hypertension<sup>36</sup> as well as metabolic syndrome<sup>48</sup> and  
45 CVD risk among adolescents.<sup>49</sup> Although a WHtR of  $\geq 0.5$  was previously proposed as the  
46 universal cut-off value to assess abdominal obesity and cardiometabolic risk,<sup>14</sup> the cut-off of  
47 0.5 resulted in poor sensitivity in predicting CVD risk among adolescents and may not be  
48 efficiently used across different ethnic groups.<sup>50</sup> Since Asians are naturally shorter in height  
49  
50  
51  
52  
53  
54  
55  
56  
57  
58  
59  
60

1  
2  
3 than Europeans of the same age and sex, lower WHtR cut-off points may be required for better  
4 accuracy in predicting cardiometabolic risks in Asian children and adolescents.  
5  
6

7  
8 Compared with other indices, ABSI presented the worst predictive power and  
9 sensitivity in identifying high BP of the adolescents in this study. ABSI was first proposed as  
10 an indicator to better reflect visceral fat over peripheral tissue; thus, it was found to be more  
11 associated with mortality hazards than BMI and WC in American adults.<sup>51</sup> However, findings  
12 from subsequent studies were largely inconsistent about the usefulness of ABSI especially in  
13 determining hypertension and CVD risk. While combined obesity measure such as ABSI  
14 presented greater predictability of mortality risk, some studies found that ABSI was not capable  
15 of identifying CVD, CVD risk and metabolic syndrome in the adult population.<sup>52,53</sup> In a study  
16 done among Portuguese adolescents, both systolic and diastolic BPs were better predicted by  
17 ABSI as compared with BMI and WC, but an unexpected inverse association of ABSI and BP  
18 was found.<sup>9</sup> Xu *et al.*<sup>19</sup> highlighted that the result was due to the inappropriate scaling  
19 exponents of ABSI in adolescents plus the confounding effect of BMI. Yet, the newly corrected  
20 ABSI was neither correlated to adolescents' BP nor significantly differentiated to those with  
21 high BP, after adjusting for BMI.<sup>19</sup> Likewise, recent studies of adolescents failed to obtain  
22 significant association between ABSI and BP.<sup>54,55</sup> Similar results were found in adults whereby  
23 ABSI had the smallest odds ratio and AUC for the prediction of hypertension.<sup>56,57</sup>  
24  
25  
26  
27  
28  
29  
30  
31  
32  
33  
34  
35  
36  
37  
38  
39  
40  
41  
42  
43

44 Based on the results of systematic review and meta-analysis, Ji, Zhang and An<sup>58</sup>  
45 concluded that ABSI was superior in predicting premature mortality risk than BMI and WC,  
46 but it underperformed in predicting chronic diseases including hypertension. While the  
47 underlying mechanisms of these contrasting results for ABSI remained unknown, variations in  
48 age, sex and ethnicity might give rise to the discrete findings. Given that both mortality and  
49 ABSI increased significantly with age,<sup>52</sup> it was suggested that age should be considered when  
50 assessing the mortality risk of different populations. In relation to hypertension, Cheung<sup>59</sup>  
51  
52  
53  
54  
55  
56  
57  
58  
59  
60

1  
2  
3 observed limited applicability of the original ABSI in the adult population of Indonesia,  
4  
5 whereas the locally adapted ABSI performed slightly better yet less accurate than BMI and  
6  
7 WC in predicting the incidence rate of hypertension. Other researcher also suggested that the  
8  
9 same structure but different exponents of ABSI should be adopted for men and women for  
10  
11 optimal performance, and it may not be applied uniformly across different populations.<sup>60</sup>  
12  
13  
14 Therefore, it is possible that these limitations confined the predictability of ABSI for  
15  
16 hypertension in our study.  
17

18  
19 Several limitations inherent to this study are worth noting. Firstly, the cross-sectional  
20  
21 design of this study does not infer the causality of associations between anthropometric indices  
22  
23 and high BP. In other words, the predictive power measured by the ROC analysis does not  
24  
25 suggest the ability to predict the development of hypertension; it is rather indicative of the  
26  
27 ability to detect the presence of hypertension. Secondly, the confounding effects from potential  
28  
29 covariates such as age, physical activity level, family hypertension history and obesity could  
30  
31 not be completely excluded since multiple factors were associated with the development of  
32  
33 obesity and hypertension. Thirdly, generalization of findings should be done cautiously as the  
34  
35 study samples were randomly selected from Selangor state only. On the contrary, the strengths  
36  
37 of this study included the sex-specific analysis of ROC as body composition differed  
38  
39 significantly between men and women. This study performed two separate analyses using the  
40  
41 90th and 95th percentile cut-offs for differentiating high BP, which allowed a better  
42  
43 comparison of the predictive power of anthropometric indices to detect high BP in adolescents.  
44  
45  
46  
47  
48  
49  
50

## 51 **Conclusions**

52  
53 The findings of this study demonstrated that the high prevalence of hypertension was evident  
54  
55 among Malaysian adolescents. As the first study to compare the prediction of high BP using  
56  
57 two different cut-off points, we suggest that early detection of high BP by anthropometric  
58  
59  
60

1  
2  
3 screening in adolescents should be based on the 90th percentile BP cut-off to prevent  
4 underestimation of those at high risk of hypertension. WHtR is an accurate and useful screening  
5 tool for predicting high BP in Malaysian adolescents alongside BMI, based on the optimal cut-  
6 off values of 0.45 in men and 0.46 in women. Unlike WC and BMI, WHtR is independent of  
7 age and sex, which provides greater convenience in terms of measurement and interpretation.  
8 Thus, WHtR can be practically used for fast and mass screening in clinical and community  
9 settings. Given its simplicity to measure and comprehend, WHtR has high potential value in  
10 the development of successful prevention and screening strategies for abdominal obesity and  
11 hypertension among adolescents.  
12  
13  
14  
15  
16  
17  
18  
19  
20  
21  
22  
23  
24  
25

26 **Acknowledgements** We greatly appreciate the schools and students for their participation and  
27 cooperation in this study.  
28  
29  
30  
31  
32

33 **Contributors** All authors contributed to the study design, revising and improving the  
34 manuscript. JYHT carried out data collection, data analysis, data interpretation, and drafted the  
35 manuscript. WYG and PYL contributed to data interpretation and provided a critical review of  
36 the manuscript.  
37  
38  
39  
40  
41  
42  
43  
44

45 **Funding** This study was supported by Putra Grant – Postgraduate Initiative (GP-IPS) from the  
46 Universiti Putra Malaysia, grant number GP/IPS/2017/9519900.  
47  
48  
49  
50

51 **Competing interests** None declared.  
52  
53  
54  
55

56 **Patient consent for publication** Not required.  
57  
58  
59  
60

**Ethics approval** Ethics Committee for Research Involving Human Subject of Universiti Putra Malaysia [Reference No. FPSK(EXP16) P186].

**Provenance and peer review** Not commissioned; externally peer reviewed.

**Data availability** The dataset analysed in this study is available from the corresponding author upon a reasonable request.

## References

1. Lozano R, Naghavi M, Foreman K, *et al.* Global and regional mortality from 235 causes of death for 20 age groups in 1990 and 2010: a systematic analysis for the Global Burden of Disease Study 2010. *Lancet* 2012;**380**:2095–128.
2. NCD Risk Factor Collaboration (NCD-RisC). Worldwide trends in blood pressure from 1975 to 2015: a pooled analysis of 1479 population-based measurement studies with 1 million participants. *Lancet* 2017;**389**:P37–55.
3. Institute for Public Health. *The National Health and Morbidity Survey (NHMS) 2015. Vol. II: Non-communicable Disease, Risk Factors & Other Health Problems* Institute for Public Health, National Institutes of Health, Ministry of Health Malaysia. 2015.
4. Kelly RK, Magnussen CG, Sabin MA, *et al.* Development of hypertension in overweight adolescents: a review. *Adolesc Health Med Ther* 2015;**6**:171–87.
5. da Silva KS, de Farias Júnior JC. Risk factors associated with high blood pressure in adolescents. *Rev Bras Med do Esporte* 2007;**2**:213–6.
6. Koebnick C, Black MH, Wu J, *et al.* High blood pressure in overweight and obese youth: implications for screening. *J Clin Hypertens* 2013;**15**:793–805.
7. Tian C, Xu S, Wang H, *et al.* Blood pressure effects of adiposity in non-overweight children aged 6–17 years. *Ann Hum Biol* 2017;**44**:644–7.
8. Chorin E, Hassidim A, Hartal M, *et al.* Trends in adolescents obesity and the association between BMI and blood pressure: a cross-sectional study in 714,922 healthy teenagers. *Am J Hypertens* 2015;**28**:1157–63.
9. Duncan MJ, Mota J, Vale S, *et al.* Associations between body mass index, waist circumference and body shape index with resting blood pressure in Portuguese adolescents. *Ann Hum Biol* 2013;**40**:163–7.
10. Mushengezi B, Chillo P. Association between body fat composition and blood pressure level among secondary school adolescents in Dar es Salaam, Tanzania. *Pan Afr Med J* 2014;**19**:327.
11. World Health Organization. (WHO). *Waist circumference and waist-hip ratio: report of a WHO expert consultation* World Health Organization Geneva. 2011.
12. Lentferink YE, Elst MAJ, Knibbe CAJ, *et al.* Predictors of insulin resistance in children versus adolescents with obesity. *J Obes* 2017;**2017**:3793868.

13. Rodea-Montero ER, Evia-Viscarra ML, Apolinar-Jiménez E. Waist-to-height ratio is a better anthropometric index than waist circumference and BMI in predicting metabolic syndrome among obese Mexican adolescents. *Int J Endocrinol* 2014;**2014**:195407.
14. Ashwell M, Gibson S. Waist-to-height ratio as an indicator of ‘early health risk’: simpler and more predictive than using a ‘matrix’ based on BMI and waist circumference. *BMJ Open* 2016;**6**:e010159.
15. Yoo EG. Waist-to-height ratio as a screening tool for obesity and cardiometabolic risk. *Korean J Pediatr* 2016;**59**:425–31.
16. Ashwell M, Gunn P, Gibson S. Waist-to-height ratio is a better screening tool than waist circumference and BMI for adult cardiometabolic risk factors: systematic review and meta-analysis. *Obes Rev* 2012;**13**: 275–86.
17. Freedman DS, Kahn HS, Mei Z, *et al*. Relation of body mass index and waist-to-height ratio to cardiovascular disease risk factors in children and adolescents. *Am J Clin Nutr* 2007;**86**:33–40.
18. Emerging Risk Factors Collaboration. Separate and combined associations of body-mass index and abdominal adiposity with cardiovascular disease: collaborative analysis of 58 prospective studies. *Lancet* 2011;**377**:1085–95.
19. Xu Y, Yan W, Cheung YB. Body shape indices and cardiometabolic risk in adolescents. *Ann Hum Biol* 2015;**42**:70–5.
20. Browning LM, Hsieh SD, Ashwell M. A systematic review of waist-to-height ratio as a screening tool for the prediction of cardiovascular disease and diabetes: 0.5 could be a suitable global boundary value. *Nutr Res Rev* 2010;**23**:247–69.
21. de Onis M, Onyango AW, Borghi E, *et al*. Development of a WHO growth reference for school-aged children and adolescents. *Bulletin of the World Health Organization*. 2007;**85**:660–7.
22. Poh BK, Jannah AN, Chong LK, *et al*. Waist circumference percentile curves for Malaysian children and adolescents aged 6.0-16.9 years. *Int J Pediatr Obes* 2011;**6**:229–35.
23. Mccarthy HD, Ashwell M. A study of central fatness using waist-to-height ratios in UK children and adolescents over two decades supports the simple message – ‘keep your waist circumference to less than half your height’. *Int J Obes* 2006;**30**:988–92.
24. Ministry of Health. *Clinical Practice Guidelines: Management of Hypertension*. 4th ed. Ministry of Health Malaysia. 2013.
25. Hosmer D, Lemeshow S. *Applied Logistic Regression*. John Wiley and Sons. 2000.
26. Fluss R, Faraggi D, Reiser B. Estimation of the Youden Index and its associated cutoff point. *Biometrical J* 2005;**4**:458–72.
27. Glascoe FP. Screening for developmental and behavioral problems. *Ment Retard Dev Disabil Res Rev* 2005;**11**:173–9.
28. Liang JJ, Chen YJ, Jin Y, *et al*. Comparison of adiposity measures in the identification of children with elevated blood pressure in Guangzhou, China. *J Hum Hypertens* 2015;**29**:732–6.
29. Genovesi S, Antolini L, Giussani M, *et al*. Usefulness of waist circumference for the identification of childhood hypertension. *J Hypertens* 2008;**26**:1563–70.
30. Kromeyer-Hauschild K, Neuhauser H, Schaffrath Rosario A, *et al*. Abdominal obesity in German adolescents defined by waist-to-height ratio and its association to elevated blood pressure: The KiGGS study. *Obes Facts* 2013;**6**:165–75.
31. Falkner B, Gidding SS, Portman R, *et al*. Blood pressure variability and classification of prehypertension and hypertension in adolescence. *Pediatrics* 2008;**122**:238–42.



- 1
- 2
- 3
- 4 32. Huang Y, Wang S, Cai X, *et al.* Prehypertension and incidence of cardiovascular
- 5 disease: a meta-analysis. *BMC Med* 2013;**11**:177.
- 6
- 7 33. Ishikawa Y, Ishikawa J, Ishikawa S, *et al.* Prehypertension and the risk for
- 8 cardiovascular disease in the Japanese general population: the Jichi Medical School
- 9 Cohort Study. *J Hypertens* 2010;**28**:1630–7.
- 10
- 11 34. Beck CC, Lopes ADS, Pitanga FJG. Anthropometric indicators as predictors of high
- 12 blood pressure in adolescents. *Arq Bras Cardiol* 2011;**96**:126–33.
- 13
- 14 35. Li WC, Chen IC, Chang YC, *et al.* Waist-to-height ratio, waist circumference, and
- 15 body mass index as indices of cardiometabolic risk among 36,642 Taiwanese adults.
- 16 *Eur J Nutr* 2013;**52**:57–65.
- 17
- 18 36. Abbaszadeh F, Sarafraz N, Atrian MK, *et al.* Anthropometric indices in the prediction
- 19 of hypertension in female adolescents. *Iran Red Crescent Med J* 2017;**19**:e14591.
- 20
- 21 37. Carpenter CL, Yan E, Chen S, *et al.* Body fat and body-mass index among a
- 22 multiethnic sample of college-age men and women. *J Obes* 2013;**2013**:790654.
- 23
- 24 38. Nightingale CM, Rudnicka AR, Owen CG, *et al.* Patterns of body size and adiposity
- 25 among UK children of South Asian, black African-Caribbean and white European
- 26 origin: Child Heart and Health Study in England (CHASE study). *Int J Epidemiol*
- 27 2011;**40**:33–44.
- 28
- 29 39. Schneider HJ, Klotsche J, Silber S, *et al.* Measuring abdominal obesity: Effects of
- 30 height on distribution of cardiometabolic risk factors risk using waist circumference
- 31 and waist-to-height ratio. *Diabetes Care* 2011;**34**:e7.
- 32
- 33 40. Hsieh SD, Yoshinaga H. Do people with similar waist circumference share similar
- 34 health risks irrespective of height? *Tohoku J Exp Med* 1999;**188**:55–60.
- 35
- 36 41. Song L, Shen L, Li H, *et al.* Height and prevalence of hypertension in a middle-aged
- 37 and older Chinese population. *Sci Rep* 2016;**6**:39480.
- 38
- 39 42. Jung C, Fischer N, Fritzenwanger M, *et al.* Anthropometric indices as predictors of
- 40 the metabolic syndrome and its components in adolescents. *Pediatr Int* 2010;**52**:402–
- 41 9.
- 42
- 43 43. Bauer KW, Marcus MD, El Ghormli L, *et al.* Cardio-metabolic risk screening among
- 44 adolescents: understanding the utility of body mass index, waist circumference, and
- 45 waist to height ratio Katherine. *Pediatr Obes* 2015;**10**:329–37.
- 46
- 47 44. Wang D, Li Y, Lee SG, *et al.* Ethnic differences in body composition and obesity
- 48 related risk factors: study in Chinese and White males living in China. *PLoS ONE*
- 49 2011;**6**:e19835.
- 50
- 51 45. Cui J, Hopper JL, Harrap SB. Genes and family environment explain correlations
- 52 between blood pressure and body mass index. *Hypertension* 2002;**40**:7–12.
- 53
- 54 46. Merlo J, Asplund K, Lynch J, *et al.* Population effects on individual systolic blood
- 55 pressure: A multilevel analysis of the World Health Organization MONICA Project.
- 56 *Am J Epidemiol* 2004;**159**:1168–79.
- 57
- 58 47. Lo K, Wong M, Khalechelvam P, *et al.* Waist-to-height ratio, body mass index and
- 59 waist circumference for screening pediatric cardio-metabolic risk factors: a meta-
- 60 analysis. *Obes Rev* 2016;**17**:1258–75.
48. Febriana K, Nurani N, Julia M. Body mass index and waist-to-height ratio cut-offs as
- predictors of high blood pressure in adolescents. *Med J Indones* 2015;**24**:30–5.
49. Zhou D, Yang M, Yuan ZP, *et al.* Waist-to-Height Ratio: A simple, effective and
- practical screening tool for childhood obesity and metabolic syndrome. *Prev Med*
- 2014;**67**:35–40.
50. Matsha TE, Kengne A-P, Yako YY, *et al.* Optimal waist-to-height ratio values for
- cardiometabolic risk screening in an ethnically diverse sample of South African urban
- and rural school boys and girls. *PLoS ONE* 2013;**8**:e71133.

- 1
  - 2
  - 3
  - 4
  - 5
  - 6
  - 7
  - 8
  - 9
  - 10
  - 11
  - 12
  - 13
  - 14
  - 15
  - 16
  - 17
  - 18
  - 19
  - 20
  - 21
  - 22
  - 23
  - 24
  - 25
  - 26
  - 27
  - 28
  - 29
  - 30
  - 31
  - 32
  - 33
  - 34
  - 35
  - 36
  - 37
  - 38
  - 39
  - 40
  - 41
  - 42
  - 43
  - 44
  - 45
  - 46
  - 47
  - 48
  - 49
  - 50
  - 51
  - 52
  - 53
  - 54
  - 55
  - 56
  - 57
  - 58
  - 59
  - 60
51. Zhao M, Bovet P, Ma C, *et al.* Performance of different adiposity measures for predicting cardiovascular risk in adolescents. *Sci Rep* 2017;**7**:43686.
52. Krakauer NY, Krakauer JC. A new body shape index predicts mortality hazard independently of body mass index. *PLoS ONE* 2012;**7**:e39504.
53. Wang H, Liu A, Zhao T, *et al.* Comparison of anthropometric indices for predicting the risk of metabolic syndrome and its components in Chinese adults: A prospective, longitudinal study. *BMJ Open* 2017;**7**:e016062.
54. Maessen MF, Eijsvogels TM, Verheggen RJ, *et al.* Entering a new era of body indices: the feasibility of a body shape index and body roundness index to identify cardiovascular health status. *PLoS ONE* 2014;**9**:e107212.
55. Mameli C, Krakauer NY, Krakauer JC, *et al.* The association between a body shape index and cardiovascular risk in overweight and obese children and adolescents. *PLoS ONE* 2018;**13**:e0190426.
56. Giudici KV, Martini LA. Comparison between body mass index and a body shape index with adiponectin/leptin ratio and markers of glucose metabolism among adolescents. *Ann Hum Biol* 2017;**44**:489–94.
57. Janghorbani M, Aminorroaya A, Amini M. Comparison of different obesity indices for predicting incident hypertension. *High Blood Press Cardiovasc Prev* 2017;**24**:157–66.
58. Chang Y, Guo X, Guo L, *et al.* The feasibility of two new anthropometric indices to identify hypertension in rural China: a cross-sectional study. *Medicine* 2016;**95**:e5301.
59. Ji M, Zhang S, An R. Effectiveness of A Body Shape Index (ABSI) in predicting chronic diseases and mortality: a systematic review and meta-analysis. *Obes Rev* 2018;**19**:737–59.
60. Cheung YB. ‘A Body Shape Index’ in middle-age and older Indonesian population: Scaling exponents and association with incident hypertension. *PLoS ONE* 2014;**9**:e85421.



STROBE Statement—Checklist of items that should be included in reports of *cross-sectional studies*

|                              | Item No | Recommendation                                                                                                                                                                                               | Page No |
|------------------------------|---------|--------------------------------------------------------------------------------------------------------------------------------------------------------------------------------------------------------------|---------|
| <b>Title and abstract</b>    | 1       | (a) Indicate the study's design with a commonly used term in the title or the abstract                                                                                                                       | 1       |
|                              |         | (b) Provide in the abstract an informative and balanced summary of what was done and what was found                                                                                                          | 2       |
| <b>Introduction</b>          |         |                                                                                                                                                                                                              |         |
| Background/rationale         | 2       | Explain the scientific background and rationale for the investigation being reported                                                                                                                         | 3-5     |
| Objectives                   | 3       | State specific objectives, including any prespecified hypotheses                                                                                                                                             | 5       |
| <b>Methods</b>               |         |                                                                                                                                                                                                              |         |
| Study design                 | 4       | Present key elements of study design early in the paper                                                                                                                                                      | 5       |
| Setting                      | 5       | Describe the setting, locations, and relevant dates, including periods of recruitment, exposure, follow-up, and data collection                                                                              | 5-6     |
| Participants                 | 6       | (a) Give the eligibility criteria, and the sources and methods of selection of participants                                                                                                                  | 5       |
| Variables                    | 7       | Clearly define all outcomes, exposures, predictors, potential confounders, and effect modifiers. Give diagnostic criteria, if applicable                                                                     | 6-7     |
| Data sources/<br>measurement | 8*      | For each variable of interest, give sources of data and details of methods of assessment (measurement). Describe comparability of assessment methods if there is more than one group                         | 6-7     |
| Bias                         | 9       | Describe any efforts to address potential sources of bias                                                                                                                                                    | 5       |
| Study size                   | 10      | Explain how the study size was arrived at                                                                                                                                                                    | 5       |
| Quantitative variables       | 11      | Explain how quantitative variables were handled in the analyses. If applicable, describe which groupings were chosen and why                                                                                 | 6-7     |
| Statistical methods          | 12      | (a) Describe all statistical methods, including those used to control for confounding                                                                                                                        | 7       |
|                              |         | (b) Describe any methods used to examine subgroups and interactions                                                                                                                                          | -       |
|                              |         | (c) Explain how missing data were addressed                                                                                                                                                                  | -       |
|                              |         | (d) If applicable, describe analytical methods taking account of sampling strategy                                                                                                                           | -       |
|                              |         | (e) Describe any sensitivity analyses                                                                                                                                                                        | 7       |
| <b>Results</b>               |         |                                                                                                                                                                                                              |         |
| Participants                 | 13*     | (a) Report numbers of individuals at each stage of study—eg numbers potentially eligible, examined for eligibility, confirmed eligible, included in the study, completing follow-up, and analysed            | 5       |
|                              |         | (b) Give reasons for non-participation at each stage                                                                                                                                                         | 5       |
|                              |         | (c) Consider use of a flow diagram                                                                                                                                                                           | -       |
| Descriptive data             | 14*     | (a) Give characteristics of study participants (eg demographic, clinical, social) and information on exposures and potential confounders                                                                     | 8       |
|                              |         | (b) Indicate number of participants with missing data for each variable of interest                                                                                                                          | 8       |
| Outcome data                 | 15*     | Report numbers of outcome events or summary measures                                                                                                                                                         | 8       |
| Main results                 | 16      | (a) Give unadjusted estimates and, if applicable, confounder-adjusted estimates and their precision (eg, 95% confidence interval). Make clear which confounders were adjusted for and why they were included | 9-12    |

|                          |    |                                                                                                                                                                            |       |
|--------------------------|----|----------------------------------------------------------------------------------------------------------------------------------------------------------------------------|-------|
|                          |    | (b) Report category boundaries when continuous variables were categorized                                                                                                  | 9-12  |
|                          |    | (c) If relevant, consider translating estimates of relative risk into absolute risk for a meaningful time period                                                           | 9-12  |
| Other analyses           | 17 | Report other analyses done—eg analyses of subgroups and interactions, and sensitivity analyses                                                                             | 9-12  |
| <b>Discussion</b>        |    |                                                                                                                                                                            |       |
| Key results              | 18 | Summarise key results with reference to study objectives                                                                                                                   | 13    |
| Limitations              | 19 | Discuss limitations of the study, taking into account sources of potential bias or imprecision. Discuss both direction and magnitude of any potential bias                 | 17    |
| Interpretation           | 20 | Give a cautious overall interpretation of results considering objectives, limitations, multiplicity of analyses, results from similar studies, and other relevant evidence | 13-17 |
| Generalisability         | 21 | Discuss the generalisability (external validity) of the study results                                                                                                      | 17    |
| <b>Other information</b> |    |                                                                                                                                                                            |       |
| Funding                  | 22 | Give the source of funding and the role of the funders for the present study and, if applicable, for the original study on which the present article is based              | 18    |

\*Give information separately for exposed and unexposed groups.

**Note:** An Explanation and Elaboration article discusses each checklist item and gives methodological background and published examples of transparent reporting. The STROBE checklist is best used in conjunction with this article (freely available on the Web sites of PLoS Medicine at <http://www.plosmedicine.org/>, Annals of Internal Medicine at <http://www.annals.org/>, and Epidemiology at <http://www.epidem.com/>). Information on the STROBE Initiative is available at [www.strobe-statement.org](http://www.strobe-statement.org).

# BMJ Open

## Comparisons of body mass index, waist circumference, waist-to-height ratio and a body shape index (ABSI) in predicting high blood pressure among Malaysian adolescents: a cross-sectional study

|                                 |                                                                                                                                                                                                                                                                                                                                |
|---------------------------------|--------------------------------------------------------------------------------------------------------------------------------------------------------------------------------------------------------------------------------------------------------------------------------------------------------------------------------|
| Journal:                        | <i>BMJ Open</i>                                                                                                                                                                                                                                                                                                                |
| Manuscript ID                   | bmjopen-2019-032874.R1                                                                                                                                                                                                                                                                                                         |
| Article Type:                   | Original research                                                                                                                                                                                                                                                                                                              |
| Date Submitted by the Author:   | 11-Nov-2019                                                                                                                                                                                                                                                                                                                    |
| Complete List of Authors:       | Tee, Joyce; Universiti Putra Malaysia, Department of Nutrition and Dietetics, Faculty of Medicine and Health Sciences<br>Gan, Wan Ying ; Universiti Putra Malaysia, Department of Nutrition and Dietetics, Faculty of Medicine and Health Sciences<br>Lim, Poh Ying; Universiti Putra Malaysia, Department of Community Health |
| <b>Primary Subject Heading</b>: | Public health                                                                                                                                                                                                                                                                                                                  |
| Secondary Subject Heading:      | Paediatrics                                                                                                                                                                                                                                                                                                                    |
| Keywords:                       | Hypertension < CARDIOLOGY, body mass index, waist circumference, waist-to-height ratio, Malaysian adolescents                                                                                                                                                                                                                  |
|                                 |                                                                                                                                                                                                                                                                                                                                |

SCHOLARONE™  
Manuscripts

1  
2  
3 **Comparisons of body mass index, waist circumference, waist-to-height ratio and a body**  
4 **shape index (ABSI) in predicting high blood pressure among Malaysian adolescents: a**  
5 **cross-sectional study**  
6  
7  
8  
9

10  
11  
12 Joyce Ying Hui Tee<sup>1</sup>, Wan Ying Gan<sup>1\*</sup>, Poh Ying Lim<sup>2</sup>  
13  
14

- 15  
16  
17 1. Department of Nutrition and Dietetics, Faculty of Medicine and Health Sciences, Universiti  
18 Putra Malaysia, Malaysia  
19  
20 2. Department of Community Health, Faculty of Medicine and Health Sciences, Universiti  
21 Putra Malaysia, Malaysia  
22  
23  
24  
25  
26  
27

28 \*Correspondence to  
29

30 Wan Ying Gan; wanying@upm.edu.my  
31  
32  
33  
34  
35  
36  
37  
38  
39  
40  
41  
42  
43  
44  
45  
46  
47  
48  
49  
50  
51  
52  
53  
54  
55  
56  
57  
58  
59  
60

## Abstract

**Objective:** To compare the performance of different anthropometric indices including body mass index (BMI), waist circumference (WC), waist-to-height ratio (WHtR) and a body shape index (ABSI) to predict high blood pressure (BP) in adolescents using the 90th and 95th percentiles as two different thresholds.

**Design:** Cross-sectional study.

**Setting:** Probability proportionate to size was used to randomly select two schools in Selangor state, Malaysia.

**Participants:** A total of 513 adolescents (58.9% women and 41.1% men) aged 12 to 16 years were recruited.

**Primary and secondary outcome measures:** Weight, height, WC and BP of the adolescents were measured. The predictive power of anthropometric indices was analyzed by sex using the receiver operating characteristic (ROC) curve.

**Results:** BMI and WHtR were the indices with higher areas under the curve (AUCs), yet the optimal cut-offs to predict high BP using the 95th percentile were higher than the threshold for overweight/obesity. Most indices showed poor sensitivity under the suggested cut-offs. In contrast, the optimal BMI and WHtR cut-offs to predict high BP using the 90th percentile were lower (men: BMI-for-age = 0.79, WHtR = 0.46; women: BMI-for-age = 0.92, WHtR = 0.45). BMI showed the highest AUC in both sexes but had poor sensitivity among women. WHtR presented good sensitivity and specificity in both sexes.

**Conclusions:** These findings suggested that WHtR might be a useful indicator for screening high blood pressure risk in the routine primary-level health services for adolescents. Future studies are warranted to involve a larger sample size to confirm these findings.

### Strengths and limitations of this study

- Sex-specific analysis of ROC was conducted.
- Two separate analyses using the 90th and 95th percentile cut-offs for differentiating high BP were performed.
- Causal association between anthropometric indices and high BP cannot be determined.
- Confounding effects of the potential covariates such as age, physical activity level, family hypertension history and obesity were not determined.

### Introduction

Hypertension has been recognized as the leading risk factor for global disease burden. It is the most common medical condition that is linked to cardiovascular diseases (CVDs), which is the main source of mortality around the world.<sup>1</sup> In 2015, the global prevalence of raised blood pressure (BP) was 24.1% in men and 20.1% in women.<sup>2</sup> In Malaysia, one in three Malaysian adults is hypertensive.<sup>3</sup> Strong evidence suggested that raised blood pressure tracks well from childhood to adulthood, yet pediatric hypertension remains largely underdiagnosed. Moreover, no data regarding the national prevalence of hypertension among Malaysian adolescents have been reported. This could probably be due to a more complicated classification of BP that varies with age, sex and height, while routine BP screening was not emphasized in pediatric clinics.

Many studies discovered the rising trend of hypertension in children and adolescents was attributed to the obesity epidemic.<sup>4,5</sup> Obese adolescents were found to have a fourfold to tenfold higher risk of developing hypertension.<sup>6</sup> Even in normal-weight adolescents, the odds of having hypertension increased with z-scores of body mass index (BMI) adjusted for age, sex and height.<sup>7</sup> A large cohort of healthy adolescents from Israel found that every increase in a

1  
2  
3 unit of BMI was associated with an increased risk of systolic BP above 130 mmHg.<sup>8</sup> These  
4  
5 results concurrently supported the established association of hypertension and excess adiposity,  
6  
7 yet the relation with the distribution of body fat remains controversial.<sup>9,10</sup> Thus, the  
8  
9 relationships are not fully understood. There are lack of data on the relationship between body  
10  
11 fat distribution and the risk of high BP among Malaysian adolescents. In addition, the universal  
12  
13 BMI classification system to define obesity in children and adolescents may not accurately  
14  
15 capture the comparable levels of body fatness of different ethnic groups. In contrast, waist  
16  
17 circumference (WC) was proposed as an alternative to BMI when examining body composition  
18  
19 and disease risk because of its sensitivity towards body size, body fat percentage and fat  
20  
21 distribution.<sup>11</sup> Previous data have shown that WC was a better predictor of metabolic  
22  
23 morbidities such as hypertension and impaired blood glucose in adolescents.<sup>12,13</sup>  
24  
25  
26  
27

28  
29 Recently, waist-to-height ratio (WHtR) was suggested as a simpler indicator of  
30  
31 abdominal obesity that has greater practical advantages than BMI and WC.<sup>14</sup> Several reviews  
32  
33 highlighted the superiority of WHtR in predicting cardiometabolic risks among adults and  
34  
35 adolescents, while its interpretation can be applied to different ethnic groups and does not  
36  
37 require sex-dependent or age-dependent cut-offs.<sup>15,16</sup> Despite so, some studies showed that  
38  
39 different anthropometric indices did not differ in their predictive abilities for CVD risk  
40  
41 factors.<sup>17,18</sup> On the other hand, a body shape index (ABSI) as an indicator of body volume  
42  
43 (corresponds to the fraction of abdominal fat to peripheral tissue) was found to predict high BP  
44  
45 better than WC and BMI in Portuguese adolescents.<sup>9</sup> However, Xu, Yan and Cheung<sup>19</sup>  
46  
47 proposed that BMI was sufficient to predict BP in adolescents, while no association between  
48  
49 ABSI and BP was observed. Overall, practical tools are needed to be established in determining  
50  
51 the risk of high BP in a quick and accurate manner among adolescents.  
52  
53  
54  
55

56  
57 Given the marked increase of pediatric hypertension alongside with the drastic rise of  
58  
59 childhood obesity, early detection of high BP via screening using anthropometric indices in  
60

1  
2  
3 adolescents could be an effective prevention of future hypertension and CVD risk. In order to  
4 analyze the discrimination abilities of anthropometric indices, the use of receiver operating  
5 characteristic (ROC) analysis has been recommended.<sup>20</sup> Cut-off values of anthropometric  
6 indices for predicting high BP could be established by running ROC analysis, which is  
7 invariably useful in screening. However, studies from different countries and ethnicities have  
8 variations in the conclusions regarding the superiority of one or the other anthropometric  
9 indices and the related cut-off values to identify high BP. It is believed that ethnic variation  
10 among population from different regions might need different cut-off values and the use of  
11 different anthropometric indices to predict high BP.  
12  
13  
14  
15  
16  
17  
18  
19  
20  
21  
22

23  
24 Up to date, very few studies performed ROC analysis and compared several  
25 anthropometric indices in Asian adolescent populations.<sup>15</sup> While early detection of high BP is  
26 possible through conducting routine anthropometric assessment in school settings, more  
27 scientific data need to be compiled to establish which indices and at which cut-off values of  
28 the indices should be used to identify adolescents with high risk of hypertension. To the best  
29 of our knowledge, no previous studies in Malaysia or neighboring Southeast Asian countries  
30 have investigated the best indicator for high BP and locally appropriate cut-off value for the  
31 prediction of high BP among adolescents. Therefore, the present study aimed to compare the  
32 predictive power of different anthropometric indices for high BP while also to determine the  
33 optimal cut-off values for differentiating high BP among Malaysian adolescents.  
34  
35  
36  
37  
38  
39  
40  
41  
42  
43  
44  
45  
46  
47  
48

## 49 **Materials and methods**

### 50 **Study design and population**

51  
52 This was a cross-sectional study involving Malaysian adolescents aged between 12 and 16  
53 years. The probability proportionate to size was used as the sampling method, in which two  
54 government secondary schools in Selangor state were randomly selected. The estimated sample  
55  
56  
57  
58  
59  
60



1  
2  
3 size of 395 was calculated using the one proportion formula based on the prevalence of  
4 hypertension of 11.6% among 13-17 years old Malaysian adolescents in a local study<sup>21</sup>,  
5  
6 considering power of 90%, precision of 0.05, significance level of 0.05, design effect of 2.0  
7  
8 and expected response rate of 80%. Adolescents who had medical conditions (e.g. sleep  
9  
10 disorders, diabetes, thyroid disease and CVDs), neurological or psychiatric disorders (e.g.  
11  
12 autism spectrum disorders, anxiety and depression), learning disabilities or developmental  
13  
14 delays were excluded from the study (n=5). Five hundred sixty eligible adolescents were  
15  
16 recruited and 513 of them agreed to participate in this study.  
17  
18  
19

20  
21 Before the commencement of the study, ethics approval was obtained from the Ethics  
22  
23 Committee for Research Involving Human Subject of Universiti Putra Malaysia [Reference No.  
24  
25 FPSK(EXP16) P186]. Approval to conduct the study was obtained from the Ministry of  
26  
27 Education, Selangor Department of Education, as well as from the principals of the selected  
28  
29 schools. Prior to data collection, all eligible adolescents were explained about the study's  
30  
31 objectives and the activities they would be involved in, with an information sheet provided. A  
32  
33 set of parent's and adolescent's consent forms were taken home by the adolescents. All the  
34  
35 completed forms were collected back on the next day. Adolescents who returned the parent's  
36  
37 and adolescent's consent form were recruited into this study. Each of them underwent both  
38  
39 anthropometric and BP measurements.  
40  
41  
42  
43  
44  
45  
46

### 47 **Anthropometric measurements**

48  
49 All measurements were taken twice to obtain the average value for further data analysis.  
50  
51 Adolescents' body weight and height were taken in light clothing and without shoes by using  
52  
53 a TANITA weighing scale THD-306 (TANITA Corporation, Arlington Heights, IL, USA) and  
54  
55 a SECA portable stadiometer 213 (SECA, Hamburg, Germany), respectively. The World  
56  
57 Health Organization (WHO) AnthroPlus software version 1.0.4 (WHO, Geneva, Switzerland)  
58  
59  
60

1  
2  
3 was used to calculate the BMI-for-age z-score (BAZ) of the adolescents. They were further  
4  
5 classified into several categories of body weight status according to the WHO Growth  
6  
7 Reference 2007.<sup>22</sup> In terms of WC, adolescents were requested to fold their arms in front of  
8  
9 their chest in a relaxed standing position while the measurements were taken using a Lufkin  
10  
11 executive diameter pocket tape (Apex Tool Group, Apex, NC, USA). According to the WC  
12  
13 percentile chart for Malaysian childhood population, a WC of >90th percentile was used as the  
14  
15 cut-off point to define abdominal obesity.<sup>23</sup> Besides, WHtR was computed by dividing WC  
16  
17 (cm) by height (cm). Abdominal obesity was classified as WHtR  $\geq 0.5$ .<sup>24</sup> ABSI of adolescents  
18  
19 was calculated using the formula proposed by Xu, Yan and Cheung<sup>19</sup> as shown below, with  
20  
21 WC and height measured in meter. Higher ABSI indicated a greater fraction of visceral fat to  
22  
23 body size.  
24  
25  
26  
27

$$28 \quad \text{ABSI} = \frac{\text{WC}}{\text{BMI}^{0.45} \times \text{Height}^{0.55}}$$

### 33 **Blood pressure measurement**

34  
35 Blood pressure was measured using a digital sphygmomanometer (Omron Model IA2 blood  
36  
37 pressure monitor, Omron, Kyoto, Japan). Adolescents were asked to sit relaxed on a chair with  
38  
39 their arms supported comfortably at the vertical level. They were classified as normal BP  
40  
41 (<90th percentile), pre-hypertension ( $\geq 90$ th to <95th percentile), stage 1 (95th to 99th  
42  
43 percentile) and stage 2 hypertension ( $> 99$ th percentile) using the normative tables of BP based  
44  
45 on age and sex adjusted for height percentiles.<sup>25</sup> For ROC analysis, adolescents were separated  
46  
47 into two BP categories: group A included those with normal BP (<95th percentile: normal and  
48  
49 pre-hypertension) and high BP ( $\geq 95$ th percentile: hypertension stages 1 and 2) and group B  
50  
51 included those with normal BP (<90th percentile: normal) and high BP ( $\geq 90$ th percentile: pre-  
52  
53 hypertension and hypertension stages 1 and 2).  
54  
55  
56  
57  
58  
59  
60

## Statistical analysis

All data were analyzed using the IBM SPSS Statistics 24 (IBM Corp., Armonk, NY, USA). The descriptive data on body composition and BP of adolescents were summarized in the total sample and by sexes. ROC analysis was employed to compare the predictive power of different body composition indices in differentiating the classification of pre-hypertension and hypertension among the adolescents. The area under the curve (AUC) was used to summarize the predictive power of these measures for high BP. An AUC of 1 reflected a perfectly accurate test, whereas 0.5 suggested that the test has no discriminatory ability. An AUC <0.7 was considered as poor, 0.7–0.8 as acceptable, 0.8–0.9 as good and >0.9 as excellent.<sup>26</sup> The optimal cut-off values of the anthropometric indices to predict high BP were estimated based on the largest value of the Youden index ( $J = Se + Sp - 1$ ).<sup>27</sup> Sensitivity, specificity and the Youden index were used to evaluate the validity of different indices in predicting high BP. The acceptable level of sensitivity and specificity of screening tests adopted in this study was 70.0%.<sup>28</sup> The level of significance for all tests was set at  $p < 0.05$ .

## Patient and public involvement

Study participants were generally healthy adolescents and no patients were involved in the study. Adolescents and their parents were not involved in the design and conduct of the study. The individual results such as weight, height, waist circumference, and blood pressure were recorded into individual health information, and this information was given back to the adolescents on the same day of data collection.

## Results

The anthropometric characteristics and BP of the adolescents in the full sample and by sex are shown in Table 1. Based on the classifications of BMI-for-age, one in three of the adolescents

was overweight or obese (32.6%). The prevalence of abdominal obesity based on WC and WHtR classifications were 14.0% and 18.5%, respectively. Almost one-fifth of the adolescents were classified as pre-hypertension (19.1%), whereas 11.9% of them were at hypertension stage 1 or 2.

**Table 1** Mean, standard deviation, range and classifications of BMI-for-age, WC, WHtR, ABSI and blood pressure of adolescents (n=513)

| Variables                     | n (%)           |                 |                 |
|-------------------------------|-----------------|-----------------|-----------------|
|                               | Total (n=513)   | Males (n=211)   | Females (n=302) |
| <b>BMI-for-age z-score</b>    | 0.25 ± 1.52     | 0.41 ± 1.60     | 0.13 ± 1.45     |
| Mean ± SD (Range)             | (-3.95 – 4.6)   | (-3.95 – 4.16)  | (-3.64 – 3.95)  |
| Thinness                      | 35 (6.8)        | 16 (7.6)        | 19 (6.3)        |
| Normal                        | 311 (60.6)      | 114 (54.0)      | 197 (65.2)      |
| Overweight                    | 93 (18.1)       | 40 (19.0)       | 53 (17.5)       |
| Obesity                       | 74 (14.5)       | 41 (19.4)       | 33 (11.0)       |
| <b>WC (cm)</b>                | 69.83 ± 10.57   | 71.35 ± 11.08   | 68.77 ± 10.08   |
| Mean ± SD (Range)             | (52.50 – 111.0) | (52.6 – 111.0)  | (52.0 – 108.0)  |
| Normal                        | 441 (86.0)      | 179 (84.8)      | 262 (86.8)      |
| Abdominal obesity             | 72 (14.0)       | 32 (15.2)       | 40 (13.2)       |
| <b>WHtR</b>                   | 0.45 ± 0.06     | 0.45 ± 0.07     | 0.44 ± 0.06     |
| Mean ± SD (Range)             | (0.32 – 0.71)   | (0.32 – 0.68)   | (0.32 – 0.71)   |
| Normal                        | 418 (81.5)      | 163 (77.3)      | 418 (81.5)      |
| Abdominal obesity             | 95 (18.5)       | 48 (22.7)       | 95 (18.5)       |
| <b>ABSI</b>                   | 0.1389 ± 0.0074 | 0.1402 ± 0.0005 | 0.1379 ± 0.0004 |
| Mean ± SD (Range)             | (0.12 – 0.17)   | (0.13 – 0.17)   | (0.12 – 0.16)   |
| <b>Systolic BP</b>            | 113.4 ± 14.4    | 116.2 ± 14.7    | 111.4 ± 13.9    |
| Mean ± SD (Range)             | (79.0 – 159.0)  | (82.0 – 159.0)  | (79.0 – 155.5)  |
| <b>Diastolic BP</b>           | 67.1 ± 9.8      | 65.5 ± 9.6      | 68.2 ± 9.9      |
| Mean ± SD (Range)             | (63.8 – 35.0)   | (42.0 – 92.6)   | (35.0 – 98.8)   |
| <b>BP classification</b>      |                 |                 |                 |
| Normal                        | 354 (69.0)      | 147 (69.7)      | 207 (68.5)      |
| (< 90th percentile)           |                 |                 |                 |
| Prehypertension               | 98 (19.1)       | 38 (18.0)       | 60 (19.9)       |
| (≥ 90th to < 95th percentile) |                 |                 |                 |
| Hypertension stage 1          | 43 (8.4)        | 21 (10.0)       | 22 (7.3)        |
| (95th to 99th percentile)     |                 |                 |                 |
| Hypertension stage 2          | 18 (3.5)        | 5 (2.4)         | 13 (4.3)        |
| (> 99th percentile)           |                 |                 |                 |

BMI: body mass index; WC: waist circumference; WHtR: Waist-to-height ratio; ABSI: a body shape index; BP: blood pressure; SD: standard deviation.

## ROC analysis based on group A

Table 2 summarizes the results of the ROC analysis of various anthropometric indices with high BP ( $\geq 95$ th percentile) among adolescents. These findings were based on group A whereby pre-hypertensive adolescents were grouped in the normal BP group (normal and pre-hypertensive) versus the high BP group (hypertension stages 1 and 2). Overall, the AUCs of BMI-for-age, WC and WHtR (range from 0.81 to 0.86) indicated good predictive power in assessing high BP of adolescents, whereas the AUC of ABSI in the total sample was less than 0.8, showing an acceptable level of predictive power. In men, the AUC of BMI was the highest (0.817), followed by WHtR (0.789), WC (0.781) and ABSI (0.709). As for the women, WC (0.863) showed the highest AUC, whereas BMI and WHtR had the same AUC (0.854) with the lowest for ABSI (0.756). Based on the Youden index, the optimal cut-off values of BMI-for-age for predicting high BP were 1.87 in men and 1.18 in women, whereas for WC were the 78th percentile for men and the 73rd percentile for women. Optimal WHtR cut-off values were 0.52 for men and 0.45 for women, whereas ABSI cut-off values to identify hypertensive adolescents were 0.15 for men and 0.14 for women. In the full sample and the women group, WHtR has the highest sensitivity ( $>90.0\%$ ) in identifying hypertensive adolescents, whereas BMI-for-age showed the highest specificity ( $>80.0\%$ ) in identifying those with normal BP. Most indices did not show an acceptable level of sensitivity ( $<70.0\%$ ) for the prediction of high BP in men, while the index with the highest specificity was WC. When further analysis was performed by comparing the AUC values of WHtR with other anthropometric indices for both sexes, only ABSI showed a significant difference with WHtR.

**Table 2** Area under ROC curve (AUC), optimal cut-off values, sensitivities, specificities and Youden index of anthropometric indices in predicting high blood pressure according to sex in Group A

| Body composition indices | AUC (95% CI)          | <i>p</i> | Cut-off value | Sensitivity (%) (95% CI) | Specificity (%) (95% CI) | Youden index | $\chi^2$ # | <i>p</i> # |
|--------------------------|-----------------------|----------|---------------|--------------------------|--------------------------|--------------|------------|------------|
| <b>Total (n = 513)</b>   |                       |          |               |                          |                          |              |            |            |
| BMI-for-age z-score      | 0.835 (0.782 – 0.889) | <0.001   | 1.47          | 68.9 (0.556 – 0.798)     | 83.6 (0.798 – 0.869)     | 0.525        | 0.62       | 0.433      |
| WC percentile            | 0.828 (0.768 – 0.888) | <0.001   | 73.0          | 80.3 (0.678 – 0.890)     | 72.1 (0.677 – 0.762)     | 0.525        | 0.15       | 0.703      |
| WHtR                     | 0.823 (0.759 – 0.887) | <0.001   | 0.44          | 90.2 (0.791 – 0.959)     | 63.7 (0.591 – 0.681)     | 0.539        | -          | -          |
| ABSI                     | 0.735 (0.662 – 0.809) | <0.001   | 0.14          | 68.9 (0.556 – 0.798)     | 71.5 (0.670 – 0.755)     | 0.403        | 19.63      | <0.001     |
| <b>Males (n = 211)</b>   |                       |          |               |                          |                          |              |            |            |
| BMI-for-age z-score      | 0.817 (0.723 – 0.912) | <0.001   | 1.87          | 69.2 (0.481 – 0.849)     | 84.3 (0.781 – 0.891)     | 0.536        | 2.38       | 0.123      |
| WC percentile            | 0.781 (0.671 – 0.891) | <0.001   | 78.0          | 57.7 (0.372 – 0.760)     | 90.8 (0.855 – 0.944)     | 0.485        | 0.30       | 0.581      |
| WHtR                     | 0.789 (0.675 – 0.903) | <0.001   | 0.52          | 65.4 (0.444 – 0.821)     | 87.6 (0.817 – 0.918)     | 0.530        | -          | -          |
| ABSI                     | 0.709 (0.577 – 0.841) | <0.001   | 0.15          | 65.4 (0.444 – 0.821)     | 85.4 (0.793 – 0.900)     | 0.508        | 10.35      | 0.001      |
| <b>Females (n = 302)</b> |                       |          |               |                          |                          |              |            |            |
| BMI-for-age z-score      | 0.854 (0.793 – 0.916) | <0.001   | 1.18          | 71.4 (0.535 – 0.848)     | 83.5 (0.784 – 0.877)     | 0.549        | 0.00       | 0.985      |
| WC percentile            | 0.863 (0.798 – 0.927) | <0.001   | 73.0          | 85.7 (0.690 – 0.946)     | 74.2 (0.684 – 0.792)     | 0.599        | 0.19       | 0.667      |

|      |                                |        |      |                            |                            |       |       |       |
|------|--------------------------------|--------|------|----------------------------|----------------------------|-------|-------|-------|
| WHtR | 0.854<br>(0.781<br>–<br>0.927) | <0.001 | 0.45 | 94.3<br>(0.795 –<br>0.990) | 65.9<br>(0.599 –<br>0.716) | 0.602 | -     | -     |
| ABSI | 0.756<br>(0.670<br>–<br>0.843) | <0.001 | 0.14 | 82.9<br>(0.657 –<br>0.928) | 62.9<br>(0.568 –<br>0.687) | 0.458 | 11.72 | 0.001 |

BMI: body mass index; WC: waist circumference; WHtR: Waist-to-height ratio; ABSI: a body shape index; ROC: receiver operating characteristic; AUC: area under the curve; CI: confidence interval.

#Comparison of the AUC value of WHtR with the other anthropometric indices

### ROC analysis based on group B

Table 3 shows the results of the ROC analysis of various anthropometric indices with high BP ( $\geq 90$ th percentile) based on group B, whereby pre-hypertensive and hypertensive adolescents were grouped together in the high BP group. The AUCs of BMI (0.793), WC (0.781) and WHtR (0.781) showed acceptable to good predictive power for high BP, except for ABSI ( $< 0.70$ ). The AUC of BMI-for-age was the highest in both sexes, followed by WHtR, WC and ABSI in women and WC, WHtR and ABSI in men. For the prediction of high BP, the optimal cut-off values of BMI-for-age were 0.79 and 0.92 in men and women, respectively. The optimal WC cut-off points used to discriminate high BP were the 72nd percentile for men and the 70th percentile for women, whereas WHtR cut-off points were 0.46 in men and 0.45 in women. ABSI cut-off values to identify hypertensive adolescents were 0.14 in both sexes. WHtR consistently showed good sensitivity and specificity ( $> 70.0\%$ ) in predicting high BP for both sexes and the full sample. The highest percentage of hypertensive adolescents could be identified based on WHtR in women (sensitivity: 71.6%) and BMI-for-age in men (sensitivity: 79.7%). On the other hand, BMI-for-age showed the highest specificity (84.5%) in women, whereas WHtR had the highest specificity in men (80.3%). Further analysis was performed to compare the AUC values of WHtR with other anthropometric indices for both sexes. Only ABSI showed a significant difference with WHtR. Overall, considering the results of AUC,

sensitivity, specificity and Youden index, WHtR was considered as the best anthropometric indices in predicting high BP among Malaysian adolescents alongside BMI.

**Table 3** Area under ROC curve (AUC), optimal cut-off values, sensitivities, specificities and Youden index of anthropometric indices in predicting high blood pressure according to sex in Group B

| Body composition indices | AUC (95% CI)          | <i>p</i> | Cut-off value | Sensitivity (%) (95% CI) | Specificity (%) (95% CI) | Youden index | $\chi^2$ # | <i>p</i> # |
|--------------------------|-----------------------|----------|---------------|--------------------------|--------------------------|--------------|------------|------------|
| <b>Total (n = 513)</b>   |                       |          |               |                          |                          |              |            |            |
| BMI-for-age z-score      | 0.793 (0.750 – 0.836) | <0.001   | 0.79          | 71.1 (0.633 – 0.778)     | 76.6 (0.717 – 0.808)     | 0.477        | 1.45       | 0.228      |
| WC percentile            | 0.781 (0.737 – 0.825) | <0.001   | 73.0          | 66.0 (0.581 – 0.732)     | 80.2 (0.756 – 0.842)     | 0.462        | 0.00       | 0.993      |
| WHtR                     | 0.781 (0.736 – 0.826) | <0.001   | 0.44          | 74.2 (0.666 – 0.807)     | 71.5 (0.664 – 0.761)     | 0.457        | -          | -          |
| ABSI                     | 0.688 (0.637 – 0.739) | <0.001   | 0.14          | 57.2 (0.491 – 0.650)     | 74.3 (0.691 – 0.784)     | 0.315        | 27.71      | <0.001     |
| <b>Males (n = 211)</b>   |                       |          |               |                          |                          |              |            |            |
| BMI-for-age z-score      | 0.808 (0.744 – 0.872) | <0.001   | 0.79          | 79.7 (0.674 – 0.883)     | 70.7 (0.626 – 0.778)     | 0.504        | 0.51       | 0.475      |
| WC percentile            | 0.788 (0.720 – 0.857) | <0.001   | 72.0          | 70.3 (0.574 – 0.808)     | 78.9 (0.713 – 0.850)     | 0.492        | 0.62       | 0.430      |
| WHtR                     | 0.799 (0.732 – 0.865) | <0.001   | 0.46          | 70.3 (0.574 – 0.808)     | 80.3 (0.727 – 0.862)     | 0.506        | -          | -          |
| ABSI                     | 0.730 (0.650 – 0.809) | <0.001   | 0.14          | 70.3 (0.574 – 0.808)     | 72.1 (0.640 – 0.790)     | 0.424        | 8.82       | 0.003      |
| <b>Females (n = 302)</b> |                       |          |               |                          |                          |              |            |            |
| BMI-for-age z-score      | 0.786 (0.729 – 0.843) | <0.001   | 0.92          | 63.2 (0.526 – 0.726)     | 84.5 (0.787 – 0.890)     | 0.477        | 1.86       | 0.172      |



|               |                                  |        |      |                            |                            |       |       |        |
|---------------|----------------------------------|--------|------|----------------------------|----------------------------|-------|-------|--------|
| WC percentile | 0.777<br>(0.719 –<br>–<br>0.835) | <0.001 | 70.0 | 63.2<br>(0.526 –<br>0.726) | 81.2<br>(0.750 –<br>0.861) | 0.443 | 0.52  | 0.471  |
| WHtR          | 0.768<br>(0.708 –<br>–<br>0.828) | <0.001 | 0.45 | 71.6<br>(0.613 –<br>0.801) | 72.9<br>(0.663 –<br>0.788) | 0.445 | -     | -      |
| ABSI          | 0.665<br>(0.598 –<br>–<br>0.731) | <0.001 | 0.14 | 54.7<br>(0.442 –<br>0.649) | 70.0<br>(0.632 –<br>0.761) | 0.248 | 16.70 | <0.001 |

BMI: body mass index; WC: waist circumference; WHtR: Waist-to-height ratio; ABSI: a body shape index; ROC: receiver operating characteristic; AUC: area under the curve; CI: confidence interval.

#Comparison of the AUC value of WHtR with the other anthropometric indices

## Discussion

Easy-to-use screening tool for hypertension is the fundamental for the detection of adolescents at risk for early intervention. This study analyzed the existing anthropometric indices for their predictive power of high BP in adolescents based on two different grouping methods. Comparable results were obtained from the ROC analysis using the  $\geq 95$ th percentile cut-off points (group A) versus the  $\geq 90$ th percentile (group B) to define high BP. Increasing evidence demonstrated the predictive power of different anthropometric indices for raised BP as defined by the  $\geq 95$ th percentile systolic or diastolic BP in children and adolescents.<sup>29-31</sup> Yet, none of the studies established the optimal cut-off values of anthropometric measures in identifying those with high BP, except for Liang *et al.*<sup>29</sup> who reported WC cut-off values. The current study reported the optimal cut-off values for the different anthropometric indices in identifying those adolescents with high BP. Given that the prevalence of hypertension appears to be increasing in adolescents, using a quick and accurate screening method in measuring BP level in this population has been considered important for public health actions.

Using the  $\geq 95$ th percentile threshold to define high BP, we found that anthropometric indices had relatively lower sensitivities (<70.0%) in prediction, especially among the men. In

1  
2  
3 both sexes, the optimal cut-off values of BMI-for-age to predict high BP were higher than the  
4 reference criteria used to identify overweight ( $BAZ \geq 1$ ).<sup>22</sup> Likewise, the optimal cut-off value  
5 of WHtR in male adolescents was above the common cut-off that defines abdominal obesity  
6 (WHtR  $\geq 0.5$ ). These results were due to the high proportion of pre-hypertensive adolescents  
7 with excess adiposity. In the pre-hypertension group, more than half of them were overweight  
8 or obese (based on the BMI-for-age), whereas more than one-third of the male adolescents  
9 (36.8%) were abdominally obese (based on the WHtR). Concurrently, a previous study showed  
10 that pre-hypertensive adolescents were more likely to be overweight and obese, with more than  
11 fourfold greater incidence rate of hypertension (up to 7% per year) as compared with those  
12 with normal BP.<sup>32</sup> In addition, emerging data from cohort studies showed that pre-hypertension  
13 increased the risk of CVD over time, even after adjusting for multiple cardiovascular risk  
14 factors.<sup>33,34</sup> Given the strong tracking of BP from childhood to adulthood, careful attention  
15 should be given to pre-hypertensive condition especially during adolescence. Hence, it is also  
16 suggested that more accurate prediction of high BP from anthropometric indices should be  
17 based on the 90th percentile threshold.

18  
19  
20  
21  
22  
23  
24  
25  
26  
27  
28  
29  
30  
31  
32  
33  
34  
35  
36  
37  
38 On the other hand, current results based on group B confirmed the significant ability of  
39 BMI, WC, WHtR and ABSI to discriminate both hypertensive and pre-hypertensive  
40 adolescents. These important findings replicated previous studies on the use of the 90th  
41 percentile for raised BP in adolescents of different ethnic groups.<sup>6,35</sup> The AUC of BMI-for-age  
42 was the highest, whereas the AUCs of WC and WHtR were comparable and performed  
43 similarly well to predict high BP in adolescents. However, BMI-for-age and WC showed low  
44 sensitivities in identifying women with high BP. Considering both sensitivity and specificity,  
45 WHtR appeared to be the best in discriminating high BP among men and women in this study.  
46  
47  
48  
49  
50  
51  
52  
53  
54  
55  
56  
57  
58  
59  
60 Altogether, these results suggest that WHtR is the most accurate indicator to predict the  
presence of elevated BP alongside BMI among adolescents in this study.

1  
2  
3 Studies found that BMI and WC were good predictors of elevated BP in adolescents.<sup>9,35</sup>  
4  
5 However, both indices exhibited low sensitivity in discriminating individuals with high BP.<sup>36,37</sup>  
6  
7 This could be due to the inability of BMI to measure fat distribution and differentiate adipose  
8 tissues and muscle mass. Previous findings also discovered the relatively weak association of  
9 BMI and percent body fat in Asians as compared with other ethnic groups, and a large  
10 proportion of individuals with high body fat content remained undetectable based on their  
11 BMI.<sup>38,39</sup> Thus, screening by BMI alone could potentially lead to underestimation of obesity-  
12 related diseases including hypertension. Given the close link of excess visceral fat and  
13 metabolic complications, indicators that reflect abdominal obesity such as WC and WHtR may  
14 perform better in predicting cardiometabolic risks.<sup>29</sup> Nonetheless, WC is a height-dependent  
15 variable; thus, not all individuals with the same WC had a similar risk of disease. Consistent  
16 findings revealed a higher metabolic risk in shorter individuals than taller ones at a given  
17 WC.<sup>40,41</sup> Even with the use of sex-specific WC percentile adjusted for age, WC might  
18 overestimate the risk of hypertension in tall adolescents but underestimate risk in short  
19 adolescents since height is a risk factor of hypertension.<sup>42</sup>  
20  
21  
22  
23  
24  
25  
26  
27  
28  
29  
30  
31  
32  
33  
34  
35  
36

37 Findings from various Asian countries concurrently supported the superiority of WHtR  
38 over WC and BMI in predicting hypertension among adolescents.<sup>42</sup> Similar results were  
39 demonstrated in a meta-analysis review focusing on the Asian population. Nevertheless, some  
40 studies showed the poor prediction of WHtR for hypertension in children and adolescents  
41 mainly in European countries.<sup>43,44</sup> The discrepancy of results could be due to ethnicity  
42 differences. As compared with Caucasians, the Asian population tends to have a greater amount  
43 of abdominal fat and total body fat but shorter height, which were associated with higher risk  
44 of hypertension through several mechanisms such as systemic inflammation, leptin resistance,  
45 hydrostatic blood vessel pressure and fat distribution around the kidneys.<sup>45</sup> Variations in term  
46 of genetic-environmental interaction, socioeconomic status, cultural influences and lifestyle-  
47  
48  
49  
50  
51  
52  
53  
54  
55  
56  
57  
58  
59  
60

1  
2  
3 related risk factors such as salt intake and physical activity level across ethnicity groups could  
4 affect the findings.<sup>46,47</sup> Besides, the variation of WHtR across age might reduce its efficacy to  
5 detect abdominal fat in children undergoing pubertal growth, since the rapid increase in height  
6 was relatively greater than the increase in WC.<sup>48</sup> Hence, the use of WHtR as a simple tool to  
7 measure and interpret represents an advantageous alternative to screen for the risk of high BP  
8 not only in the clinical setting, but also at the community setting.

9  
10  
11  
12  
13  
14  
15  
16  
17 The current study found that the optimal cut-off points of BMI, WC and WHtR for the  
18 prediction of high BP were lower than the threshold to define obesity in adolescents, replicating  
19 the results of previous studies.<sup>37,49</sup> In the present study, the optimal WHtR cut-off values were  
20 0.46 in men and 0.45 in women, which were close to the WHtR cut-off values (<0.5) reported  
21 by previous studies for the prediction of hypertension<sup>37</sup> as well as metabolic syndrome<sup>50</sup> and  
22 CVD risk among adolescents.<sup>51</sup> Although a WHtR of  $\geq 0.5$  was previously proposed as the  
23 universal cut-off value to assess abdominal obesity and cardiometabolic risk,<sup>14</sup> the cut-off of  
24 0.5 resulted in poor sensitivity in predicting CVD risk among adolescents and may not be  
25 efficiently used across different ethnic groups.<sup>52</sup> Since Asians are naturally shorter in height  
26 than Europeans of the same age and sex, lower WHtR cut-off points may be required for better  
27 accuracy in predicting cardiometabolic risks in Asian children and adolescents.

28  
29  
30  
31  
32  
33  
34  
35  
36  
37  
38  
39  
40  
41  
42 Compared with other indices, ABSI presented the worst predictive power and  
43 sensitivity in identifying high BP of the adolescents in this study. ABSI was first proposed as  
44 an indicator to better reflect visceral fat over peripheral tissue; thus, it was found to be more  
45 associated with mortality hazards than BMI and WC in American adults.<sup>53</sup> However, findings  
46 from subsequent studies were largely inconsistent about the usefulness of ABSI especially in  
47 determining hypertension and CVD risk. While combined obesity measure such as ABSI  
48 presented greater predictability of mortality risk, some studies found that ABSI was not capable  
49 of identifying CVD, CVD risk and metabolic syndrome in the adult population.<sup>54,55</sup> In a study  
50  
51  
52  
53  
54  
55  
56  
57  
58  
59  
60

1  
2  
3 done among Portuguese adolescents, both systolic and diastolic BPs were better predicted by  
4 ABSI as compared with BMI and WC, but an unexpected inverse association of ABSI and BP  
5 was found.<sup>9</sup> Xu *et al.*<sup>19</sup> highlighted that the result was due to the inappropriate scaling  
6 exponents of ABSI in adolescents plus the confounding effect of BMI. Yet, the newly corrected  
7 ABSI was neither correlated to adolescents' BP nor significantly differentiated to those with  
8 high BP, after adjusting for BMI.<sup>19</sup> Likewise, recent studies of adolescents failed to obtain  
9 significant association between ABSI and BP.<sup>56,57</sup> Similar results were found in adults whereby  
10 ABSI had the smallest odds ratio and AUC for the prediction of hypertension.<sup>58</sup>

21 Based on the results of systematic review and meta-analysis, Ji, Zhang and An<sup>59</sup>  
22 concluded that ABSI was superior in predicting premature mortality risk than BMI and WC,  
23 but it underperformed in predicting chronic diseases including hypertension. While the  
24 underlying mechanisms of these contrasting results for ABSI remained unknown, variations in  
25 age, sex and ethnicity might give rise to the discrete findings. Given that both mortality and  
26 ABSI increased significantly with age,<sup>53</sup> it was suggested that age should be considered when  
27 assessing the mortality risk of different populations. In relation to hypertension, Cheung<sup>60</sup>  
28 observed limited applicability of the original ABSI in the adult population of Indonesia,  
29 whereas the locally adapted ABSI performed slightly better yet less accurate than BMI and  
30 WC in predicting the incidence rate of hypertension. Cheung<sup>60</sup> also suggested that the same  
31 structure but different exponents of ABSI should be adopted for men and women for optimal  
32 performance, and it may not be applied uniformly across different populations. Therefore, it is  
33 possible that these limitations confined the predictability of ABSI for hypertension in our study.

51 In term of practical application, the findings of this study bring some points to be  
52 considered in future public health actions. First, it is important to have routine measurement  
53 for blood pressure in school and clinic settings in order to improve the early detection,  
54 prevention and treatment of hypertension in adolescents. WHtR may serve as a simple and  
55  
56  
57  
58  
59  
60

1  
2  
3 inexpensive screening tool to identify high BP among adolescents in schools and those at risk  
4  
5 can be referred for further diagnostic evaluation in hospitals. Second, it is essential to develop  
6  
7 and implement effective public health strategies to prevent and control prehypertension,  
8  
9 hypertension and obesity among adolescents.  
10  
11

12 Several limitations inherent to this study are worth noting. Firstly, the cross-sectional  
13  
14 design of this study does not infer the causality of associations between anthropometric indices  
15  
16 and high BP. In other words, the predictive power measured by the ROC analysis does not  
17  
18 suggest the ability to predict the development of hypertension; it is rather indicative of the  
19  
20 ability to detect the presence of hypertension. Secondly, the confounding effects from potential  
21  
22 covariates such as age, physical activity level, family hypertension history and obesity could  
23  
24 not be completely excluded since multiple factors were associated with the development of  
25  
26 obesity and hypertension. In addition, pubertal status of the adolescents was not evaluated in  
27  
28 this study. Thirdly, generalization of findings should be done cautiously as the study samples  
29  
30 were randomly selected from Selangor state only. Further studies with larger samples should  
31  
32 be conducted. On the contrary, the strengths of this study included the sex-specific analysis of  
33  
34 ROC as body composition differed significantly between men and women. This study  
35  
36 performed two separate analyses using the 90th and 95th percentile cut-offs for differentiating  
37  
38 high BP, which allowed a better comparison of the predictive power of anthropometric indices  
39  
40 to detect high BP in adolescents.  
41  
42  
43  
44  
45  
46  
47  
48

## 49 **Conclusions**

50  
51 The findings of this study demonstrated that the high prevalence of hypertension was evident  
52  
53 among Malaysian adolescents. As the first study to compare the prediction of high BP using  
54  
55 two different cut-off points, we suggest that early detection of high BP by anthropometric  
56  
57 screening in adolescents should be based on the 90th percentile BP cut-off to prevent  
58  
59  
60

1  
2  
3 underestimation of those at high risk of hypertension. WHtR might be a useful indicator for  
4 screening high blood pressure risk in the school setting or in the routine primary-level health  
5 services for Malaysian adolescents alongside BMI, based on the optimal cut-off values of 0.45  
6 in men and 0.46 in women. Unlike WC and BMI, WHtR is independent of age and sex, which  
7 provides greater convenience in terms of measurement and interpretation. Thus, WHtR can be  
8 practically used for fast and mass screening in clinical and community settings. Given its  
9 simplicity to measure and comprehend, WHtR has high potential value in the development of  
10 successful prevention and screening strategies for abdominal obesity and hypertension among  
11 adolescents.  
12  
13  
14  
15  
16  
17  
18  
19  
20  
21  
22  
23  
24  
25

26 **Acknowledgements** We greatly appreciate the schools and students for their participation and  
27 cooperation in this study.  
28  
29  
30  
31  
32

33 **Contributors** All authors contributed to the study design, revising and improving the  
34 manuscript. JYHT carried out data collection, data analysis, data interpretation, and drafted the  
35 manuscript. WYG and PYL contributed to data interpretation and provided a critical review of  
36 the manuscript.  
37  
38  
39  
40  
41  
42  
43  
44

45 **Funding** This study was supported by Putra Grant – Postgraduate Initiative (GP-IPS) from the  
46 Universiti Putra Malaysia, grant number GP/IPS/2017/9519900.  
47  
48  
49  
50

51 **Competing interests** None declared.  
52  
53  
54  
55

56 **Patient consent for publication** Not required.  
57  
58  
59  
60



**Ethics approval** Ethics Committee for Research Involving Human Subject of Universiti Putra Malaysia [Reference No. FPSK(EXP16) P186].

**Provenance and peer review** Not commissioned; externally peer reviewed.

**Data availability** The dataset analysed in this study is available from the corresponding author upon a reasonable request.

## References

1. Lozano R, Naghavi M, Foreman K, *et al.* Global and regional mortality from 235 causes of death for 20 age groups in 1990 and 2010: a systematic analysis for the Global Burden of Disease Study 2010. *Lancet* 2012;**380**:2095–128.
2. NCD Risk Factor Collaboration (NCD-RisC). Worldwide trends in blood pressure from 1975 to 2015: a pooled analysis of 1479 population-based measurement studies with 1 million participants. *Lancet* 2017;**389**:P37–55.
3. Institute for Public Health. *The National Health and Morbidity Survey (NHMS) 2015. Vol. II: Non-communicable Disease, Risk Factors & Other Health Problems* Institute for Public Health, National Institutes of Health, Ministry of Health Malaysia. 2015.
4. Kelly RK, Magnussen CG, Sabin MA, *et al.* Development of hypertension in overweight adolescents: a review. *Adolesc Health Med Ther* 2015;**6**:171–87.
5. da Silva KS, de Farias Júnior JC. Risk factors associated with high blood pressure in adolescents. *Rev Bras Med do Esporte* 2007;**2**:213–6.
6. Koebnick C, Black MH, Wu J, *et al.* High blood pressure in overweight and obese youth: implications for screening. *J Clin Hypertens* 2013;**15**:793–805.
7. Tian C, Xu S, Wang H, *et al.* Blood pressure effects of adiposity in non-overweight children aged 6–17 years. *Ann Hum Biol* 2017;**44**:644–7.
8. Chorin E, Hassidim A, Hartal M, *et al.* Trends in adolescents obesity and the association between BMI and blood pressure: a cross-sectional study in 714,922 healthy teenagers. *Am J Hypertens* 2015;**28**:1157–63.
9. Duncan MJ, Mota J, Vale S, *et al.* Associations between body mass index, waist circumference and body shape index with resting blood pressure in Portuguese adolescents. *Ann Hum Biol* 2013;**40**:163–7.
10. Mushengezi B, Chillo P. Association between body fat composition and blood pressure level among secondary school adolescents in Dar es Salaam, Tanzania. *Pan Afr Med J* 2014;**19**:327.
11. World Health Organization. (WHO). *Waist circumference and waist-hip ratio: report of a WHO expert consultation* World Health Organization Geneva. 2011.
12. Lentferink YE, Elst MAJ, Knibbe CAJ, *et al.* Predictors of insulin resistance in children versus adolescents with obesity. *J Obes* 2017;**2017**:3793868.



13. Rodea-Montero ER, Evia-Viscarra ML, Apolinar-Jiménez E. Waist-to-height ratio is a better anthropometric index than waist circumference and BMI in predicting metabolic syndrome among obese Mexican adolescents. *Int J Endocrinol* 2014;**2014**:195407.
14. Ashwell M, Gibson S. Waist-to-height ratio as an indicator of ‘early health risk’: simpler and more predictive than using a ‘matrix’ based on BMI and waist circumference. *BMJ Open* 2016;**6**:e010159.
15. Yoo EG. Waist-to-height ratio as a screening tool for obesity and cardiometabolic risk. *Korean J Pediatr* 2016;**59**:425–31.
16. Ashwell M, Gunn P, Gibson S. Waist-to-height ratio is a better screening tool than waist circumference and BMI for adult cardiometabolic risk factors: systematic review and meta-analysis. *Obes Rev* 2012;**13**: 275–86.
17. Freedman DS, Kahn HS, Mei Z, *et al*. Relation of body mass index and waist-to-height ratio to cardiovascular disease risk factors in children and adolescents. *Am J Clin Nutr* 2007;**86**:33–40.
18. Emerging Risk Factors Collaboration. Separate and combined associations of body-mass index and abdominal adiposity with cardiovascular disease: collaborative analysis of 58 prospective studies. *Lancet* 2011;**377**:1085–95.
19. Xu Y, Yan W, Cheung YB. Body shape indices and cardiometabolic risk in adolescents. *Ann Hum Biol* 2015;**42**:70–5.
20. Browning LM, Hsieh SD, Ashwell M. A systematic review of waist-to-height ratio as a screening tool for the prediction of cardiovascular disease and diabetes: 0.5 could be a suitable global boundary value. *Nutr Res Rev* 2010;**23**:247–69.
21. Rampal L, Ng KC, Izzati IN, Izzati ZF, Nazrul IM, Faisal I. Prevalence of hypertension among Malay adolescents in Putrajaya secondary schools, Malaysia, 2010. *MJMHS* 2011;**7**:53–60.
22. de Onis M, Onyango AW, Borghi E, *et al*. Development of a WHO growth reference for school-aged children and adolescents. *Bulletin of the World Health Organization*. 2007;**85**:660–7.
23. Poh BK, Jannah AN, Chong LK, *et al*. Waist circumference percentile curves for Malaysian children and adolescents aged 6.0-16.9 years. *Int J Pediatr Obes* 2011;**6**:229–35.
24. Mccarthy HD, Ashwell M. A study of central fatness using waist-to-height ratios in UK children and adolescents over two decades supports the simple message – ‘keep your waist circumference to less than half your height’. *Int J Obes* 2006;**30**:988–92.
25. Ministry of Health. *Clinical Practice Guidelines: Management of Hypertension*. 4th ed. Ministry of Health Malaysia. 2013.
26. Hosmer D, Lemeshow S. *Applied Logistic Regression*. John Wiley and Sons. 2000.
27. Fluss R, Faraggi D, Reiser B. Estimation of the Youden Index and its associated cutoff point. *Biometrical J* 2005;**4**:458–72.
28. Glascoe FP. Screening for developmental and behavioral problems. *Ment Retard Dev Disabil Res Rev* 2005;**11**:173–9.
29. Liang JJ, Chen YJ, Jin Y, *et al*. Comparison of adiposity measures in the identification of children with elevated blood pressure in Guangzhou, China. *J Hum Hypertens* 2015;**29**:732–6.
30. Genovesi S, Antolini L, Giussani M, *et al*. Usefulness of waist circumference for the identification of childhood hypertension. *J Hypertens* 2008;**26**:1563–70.
31. Kromeyer-Hauschild K, Neuhauser H, Schaffrath Rosario A, *et al*. Abdominal obesity in German adolescents defined by waist-to-height ratio and its association to elevated blood pressure: The KiGGS study. *Obes Facts* 2013;**6**:165–75.

- 1
- 2
- 3 32. Falkner B, Gidding SS, Portman R, *et al.* Blood pressure variability and classification
- 4 of prehypertension and hypertension in adolescence. *Pediatrics* 2008;**122**:238–42.
- 5 33. Huang Y, Wang S, Cai X, *et al.* Prehypertension and incidence of cardiovascular
- 6 disease: a meta-analysis. *BMC Med* 2013;**11**:177.
- 7 34. Ishikawa Y, Ishikawa J, Ishikawa S, *et al.* Prehypertension and the risk for
- 8 cardiovascular disease in the Japanese general population: the Jichi Medical School
- 9 Cohort Study. *J Hypertens* 2010;**28**:1630–7.
- 10 35. Beck CC, Lopes ADS, Pitanga FJG. Anthropometric indicators as predictors of high
- 11 blood pressure in adolescents. *Arq Bras Cardiol* 2011;**96**:126–33.
- 12 36. Li WC, Chen IC, Chang YC, *et al.* Waist-to-height ratio, waist circumference, and
- 13 body mass index as indices of cardiometabolic risk among 36,642 Taiwanese adults.
- 14 *Eur J Nutr* 2013;**52**:57–65.
- 15 37. Abbaszadeh F, Sarafranz N, Atrian MK, *et al.* Anthropometric indices in the prediction
- 16 of hypertension in female adolescents. *Iran Red Crescent Med J* 2017;**19**:e14591.
- 17 38. Carpenter CL, Yan E, Chen S, *et al.* Body fat and body-mass index among a
- 18 multiethnic sample of college-age men and women. *J Obes* 2013;**2013**:790654.
- 19 39. Nightingale CM, Rudnicka AR, Owen CG, *et al.* Patterns of body size and adiposity
- 20 among UK children of South Asian, black African-Caribbean and white European
- 21 origin: Child Heart and Health Study in England (CHASE study). *Int J Epidemiol*
- 22 2011;**40**:33–44.
- 23 40. Schneider HJ, Klotsche J, Silber S, *et al.* Measuring abdominal obesity: Effects of
- 24 height on distribution of cardiometabolic risk factors risk using waist circumference
- 25 and waist-to-height ratio. *Diabetes Care* 2011;**34**:e7.
- 26 41. Hsieh SD, Yoshinaga H. Do people with similar waist circumference share similar
- 27 health risks irrespective of height? *Tohoku J Exp Med* 1999;**188**:55–60.
- 28 42. Song L, Shen L, Li H, *et al.* Height and prevalence of hypertension in a middle-aged
- 29 and older Chinese population. *Sci Rep* 2016;**6**:39480.
- 30 43. Jung C, Fischer N, Fritzenwanger M, *et al.* Anthropometric indices as predictors of
- 31 the metabolic syndrome and its components in adolescents. *Pediatr Int* 2010;**52**:402–
- 32 9.
- 33 44. Bauer KW, Marcus MD, El Ghormli L, *et al.* Cardio-metabolic risk screening among
- 34 adolescents: understanding the utility of body mass index, waist circumference, and
- 35 waist to height ratio. *Pediatr Obes* 2015;**10**:329–37.
- 36 45. Wang D, Li Y, Lee SG, *et al.* Ethnic differences in body composition and obesity
- 37 related risk factors: study in Chinese and White males living in China. *PLoS ONE*
- 38 2011;**6**:e19835.
- 39 46. Cui J, Hopper JL, Harrap SB. Genes and family environment explain correlations
- 40 between blood pressure and body mass index. *Hypertension* 2002;**40**:7–12.
- 41 47. Merlo J, Asplund K, Lynch J, *et al.* Population effects on individual systolic blood
- 42 pressure: A multilevel analysis of the World Health Organization MONICA Project.
- 43 *Am J Epidemiol* 2004;**159**:1168–79.
- 44 48. Lo K, Wong M, Khalechelvam P, *et al.* Waist-to-height ratio, body mass index and
- 45 waist circumference for screening pediatric cardio-metabolic risk factors: a meta-
- 46 analysis. *Obes Rev* 2016;**17**:1258–75.
- 47 49. Febriana K, Nurani N, Julia M. Body mass index and waist-to-height ratio cut-offs as
- 48 predictors of high blood pressure in adolescents. *Med J Indones* 2015;**24**:30–5.
- 49 50. Zhou D, Yang M, Yuan ZP, *et al.* Waist-to-Height Ratio: A simple, effective and
- 50 practical screening tool for childhood obesity and metabolic syndrome. *Prev Med*
- 51 2014;**67**:35–40.
- 52
- 53
- 54
- 55
- 56
- 57
- 58
- 59
- 60

- 1
- 2
- 3
- 4 51. Matsha TE, Kengne A-P, Yako YY, *et al.* Optimal waist-to-height ratio values for
- 5 cardiometabolic risk screening in an ethnically diverse sample of South African urban
- 6 and rural school boys and girls. *PLoS ONE* 2013;**8**:e71133.
- 7 52. Zhao M, Bovet P, Ma C, *et al.* Performance of different adiposity measures for
- 8 predicting cardiovascular risk in adolescents. *Sci Rep* 2017;**7**:43686.
- 9 53. Krakauer NY, Krakauer JC. A new body shape index predicts mortality hazard
- 10 independently of body mass index. *PLoS ONE* 2012;**7**:e39504.
- 11 54. Wang H, Liu A, Zhao T, *et al.* Comparison of anthropometric indices for predicting
- 12 the risk of metabolic syndrome and its components in Chinese adults: A prospective,
- 13 longitudinal study. *BMJ Open* 2017;**7**:e016062.
- 14 55. Maessen MF, Eijsvogels TM, Verheggen RJ, *et al.* Entering a new era of body
- 15 indices: the feasibility of a body shape index and body roundness index to identify
- 16 cardiovascular health status. *PLoS ONE* 2014;**9**:e107212.
- 17 56. Mameli C, Krakauer NY, Krakauer JC, *et al.* The association between a body shape
- 18 index and cardiovascular risk in overweight and obese children and adolescents. *PLoS*
- 19 *ONE* 2018;**13**:e0190426.
- 20 57. Giudici KV, Martini LA. Comparison between body mass index and a body shape
- 21 index with adiponectin/leptin ratio and markers of glucose metabolism among
- 22 adolescents. *Ann Hum Biol* 2017;**44**:489–94.
- 23 58. Chang Y, Guo X, Guo L, *et al.* The feasibility of two new anthropometric indices to
- 24 identify hypertension in rural China: a cross-sectional study. *Medicine*
- 25 2016;**95**:e5301.
- 26 59. Ji M, Zhang S, An R. Effectiveness of A Body Shape Index (ABSI) in predicting
- 27 chronic diseases and mortality: a systematic review and meta-analysis. *Obes Rev*
- 28 2018;**19**:737–59.
- 29 60. Cheung YB. ‘A Body Shape Index’ in middle-age and older Indonesian population:
- 30 Scaling exponents and association with incident hypertension. *PLoS ONE*
- 31 2014;**9**:e85421.
- 32
- 33
- 34
- 35
- 36
- 37
- 38
- 39
- 40
- 41
- 42
- 43
- 44
- 45
- 46
- 47
- 48
- 49
- 50
- 51
- 52
- 53
- 54
- 55
- 56
- 57
- 58
- 59
- 60

STROBE Statement—Checklist of items that should be included in reports of *cross-sectional studies*

|                              | Item No | Recommendation                                                                                                                                                                                               | Page No |
|------------------------------|---------|--------------------------------------------------------------------------------------------------------------------------------------------------------------------------------------------------------------|---------|
| <b>Title and abstract</b>    | 1       | (a) Indicate the study's design with a commonly used term in the title or the abstract                                                                                                                       | 1       |
|                              |         | (b) Provide in the abstract an informative and balanced summary of what was done and what was found                                                                                                          | 2       |
| <b>Introduction</b>          |         |                                                                                                                                                                                                              |         |
| Background/rationale         | 2       | Explain the scientific background and rationale for the investigation being reported                                                                                                                         | 3-5     |
| Objectives                   | 3       | State specific objectives, including any prespecified hypotheses                                                                                                                                             | 5       |
| <b>Methods</b>               |         |                                                                                                                                                                                                              |         |
| Study design                 | 4       | Present key elements of study design early in the paper                                                                                                                                                      | 5       |
| Setting                      | 5       | Describe the setting, locations, and relevant dates, including periods of recruitment, exposure, follow-up, and data collection                                                                              | 5-6     |
| Participants                 | 6       | (a) Give the eligibility criteria, and the sources and methods of selection of participants                                                                                                                  | 5       |
| Variables                    | 7       | Clearly define all outcomes, exposures, predictors, potential confounders, and effect modifiers. Give diagnostic criteria, if applicable                                                                     | 6-7     |
| Data sources/<br>measurement | 8*      | For each variable of interest, give sources of data and details of methods of assessment (measurement). Describe comparability of assessment methods if there is more than one group                         | 6-7     |
| Bias                         | 9       | Describe any efforts to address potential sources of bias                                                                                                                                                    | 5       |
| Study size                   | 10      | Explain how the study size was arrived at                                                                                                                                                                    | 6       |
| Quantitative variables       | 11      | Explain how quantitative variables were handled in the analyses. If applicable, describe which groupings were chosen and why                                                                                 | 6-7     |
| Statistical methods          | 12      | (a) Describe all statistical methods, including those used to control for confounding                                                                                                                        | 8       |
|                              |         | (b) Describe any methods used to examine subgroups and interactions                                                                                                                                          | -       |
|                              |         | (c) Explain how missing data were addressed                                                                                                                                                                  | -       |
|                              |         | (d) If applicable, describe analytical methods taking account of sampling strategy                                                                                                                           | -       |
|                              |         | (e) Describe any sensitivity analyses                                                                                                                                                                        | 8       |
| <b>Results</b>               |         |                                                                                                                                                                                                              |         |
| Participants                 | 13*     | (a) Report numbers of individuals at each stage of study—eg numbers potentially eligible, examined for eligibility, confirmed eligible, included in the study, completing follow-up, and analysed            | 6       |
|                              |         | (b) Give reasons for non-participation at each stage                                                                                                                                                         | 6       |
|                              |         | (c) Consider use of a flow diagram                                                                                                                                                                           | -       |
| Descriptive data             | 14*     | (a) Give characteristics of study participants (eg demographic, clinical, social) and information on exposures and potential confounders                                                                     | 9       |
|                              |         | (b) Indicate number of participants with missing data for each variable of interest                                                                                                                          | 9       |
| Outcome data                 | 15*     | Report numbers of outcome events or summary measures                                                                                                                                                         | 9       |
| Main results                 | 16      | (a) Give unadjusted estimates and, if applicable, confounder-adjusted estimates and their precision (eg, 95% confidence interval). Make clear which confounders were adjusted for and why they were included | 9-14    |

|                          |    |                                                                                                                                                                            |       |
|--------------------------|----|----------------------------------------------------------------------------------------------------------------------------------------------------------------------------|-------|
|                          |    | (b) Report category boundaries when continuous variables were categorized                                                                                                  | 9-14  |
|                          |    | (c) If relevant, consider translating estimates of relative risk into absolute risk for a meaningful time period                                                           | -     |
| Other analyses           | 17 | Report other analyses done—eg analyses of subgroups and interactions, and sensitivity analyses                                                                             | 9-14  |
| <b>Discussion</b>        |    |                                                                                                                                                                            |       |
| Key results              | 18 | Summarise key results with reference to study objectives                                                                                                                   | 14    |
| Limitations              | 19 | Discuss limitations of the study, taking into account sources of potential bias or imprecision. Discuss both direction and magnitude of any potential bias                 | 19    |
| Interpretation           | 20 | Give a cautious overall interpretation of results considering objectives, limitations, multiplicity of analyses, results from similar studies, and other relevant evidence | 14-19 |
| Generalisability         | 21 | Discuss the generalisability (external validity) of the study results                                                                                                      | 19    |
| <b>Other information</b> |    |                                                                                                                                                                            |       |
| Funding                  | 22 | Give the source of funding and the role of the funders for the present study and, if applicable, for the original study on which the present article is based              | 20    |

\*Give information separately for exposed and unexposed groups.

**Note:** An Explanation and Elaboration article discusses each checklist item and gives methodological background and published examples of transparent reporting. The STROBE checklist is best used in conjunction with this article (freely available on the Web sites of PLoS Medicine at <http://www.plosmedicine.org/>, Annals of Internal Medicine at <http://www.annals.org/>, and Epidemiology at <http://www.epidem.com/>). Information on the STROBE Initiative is available at [www.strobe-statement.org](http://www.strobe-statement.org).
